# Supplementary material for: Rational design of diketopyrrolopyrrole-based oligomers with deep HOMO level and tunable liquid crystal behavior by modulating the sequence and strength of the donor moiety
Source: Royal Society of Chemistry journal article supplement (doi:10.1039/c5tc02385h), 2015-01-01
Supplement: c5tc02385h1.pdf [file c5tc02385h1.pdf]

## Supporting Information

### Rational Design of Diketopyrrolopyrrole-based Oligomers with Deep HOMO Level and Tunable Liquid Crystal Behavior by Modulating the Sequence and Strength of Donor Moiety

Jin-Liang Wang,\* Zheng-Feng Chang, Xiao-Xin Song, Kai-Kai Liu, Ling-Min Jing

#### 1. Experimental Details

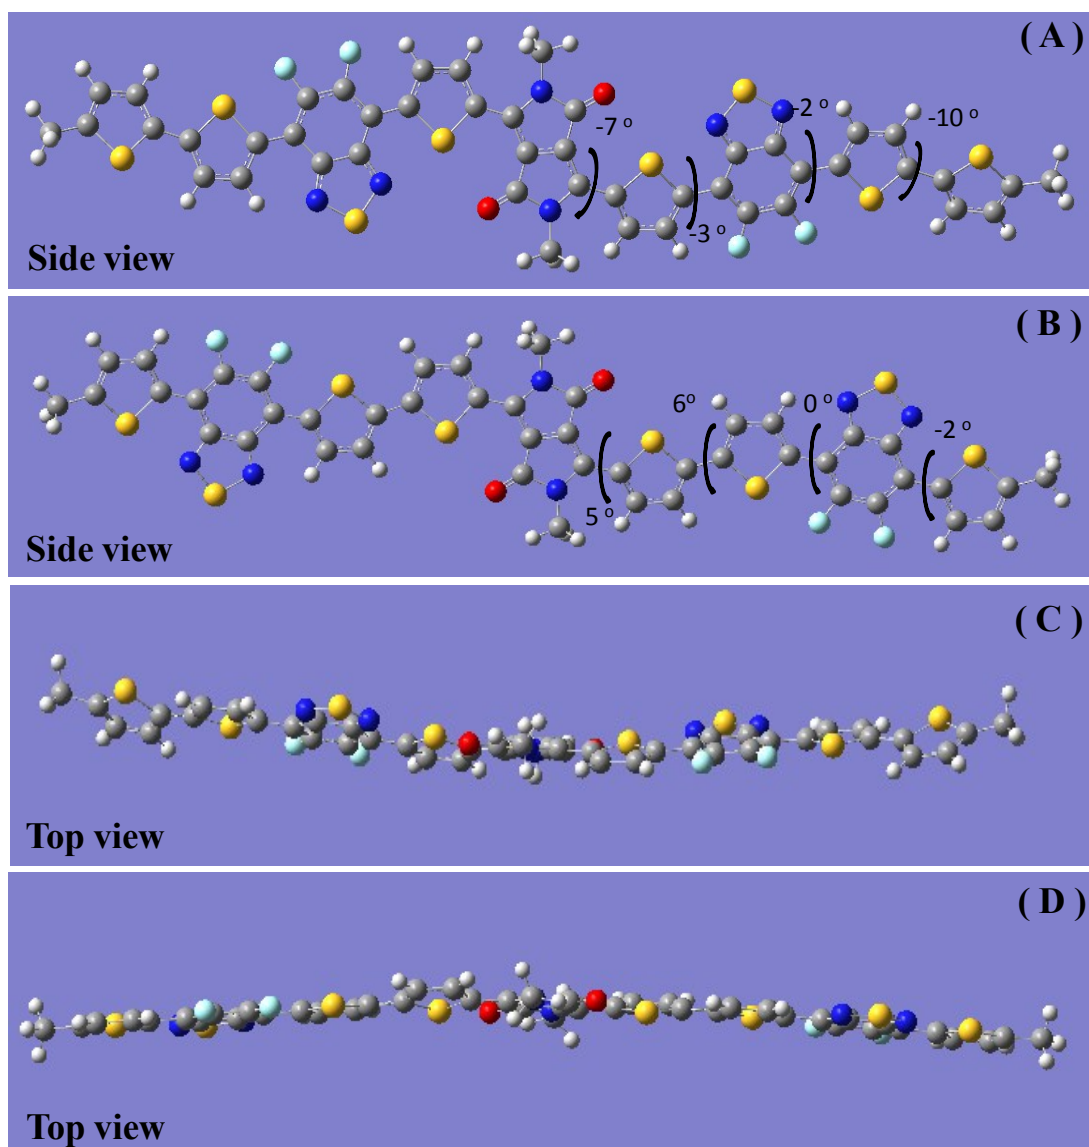

**Figure S1:** DFT-optimized geometries and the side, top views of **DTFB2T** (A and C) and **D2TFBT** (B and D) based on density functional theory (DFT) calculation.

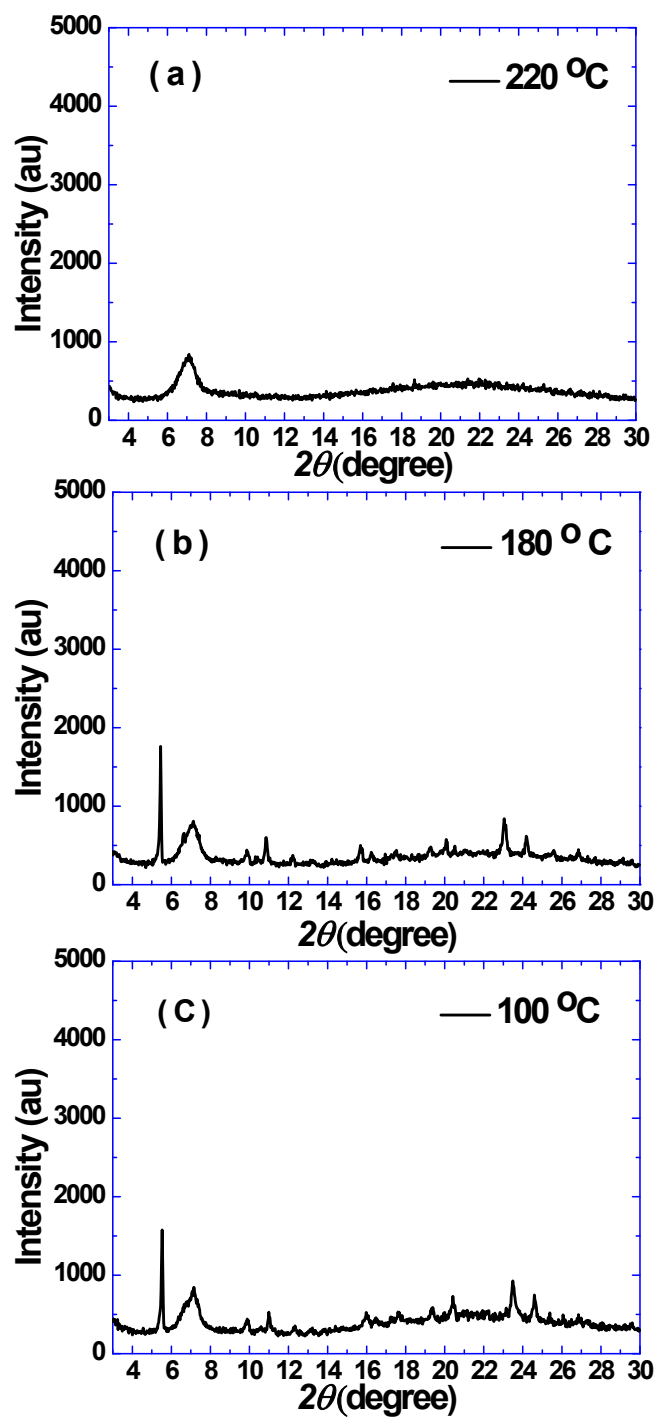

**Figure S2.** XRD patterns of D2TFBT from 1°-30° ( $2\theta$ ) (a) at 220 °C, (b) at 180 °C, (c) at 100 °C. The peak at about 7 ° denotes reflection from the peak of background.

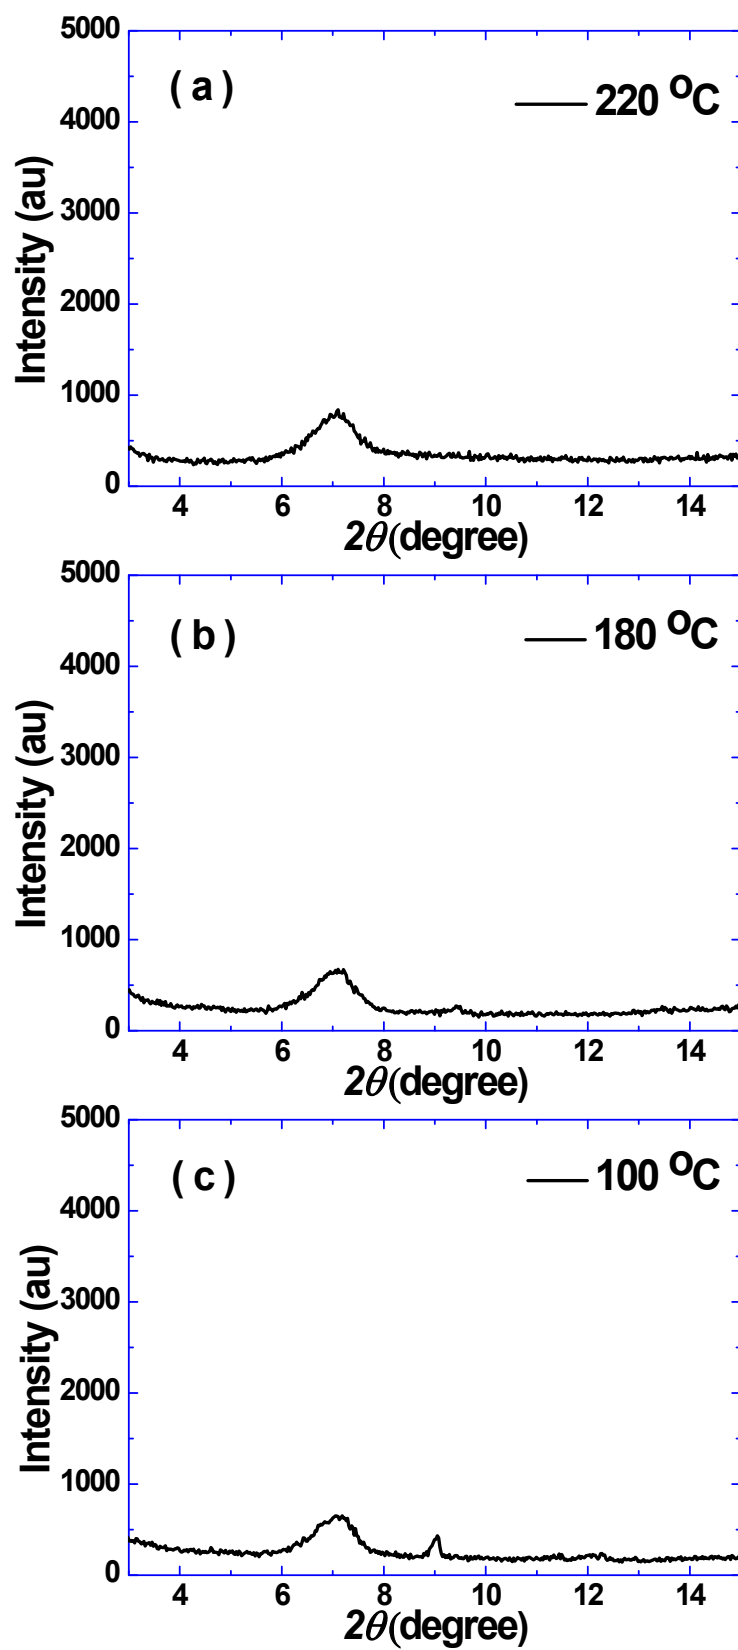

**Figure S3.** XRD patterns of DTFB2T (a) at 220 °C, (b) at 180 °C, (c) at 100 °C. The peak at about 7 ° denotes reflection from the peak of background.

## 2. Copies of $^1\text{H}$ and $^{13}\text{C}$ NMR Spectra

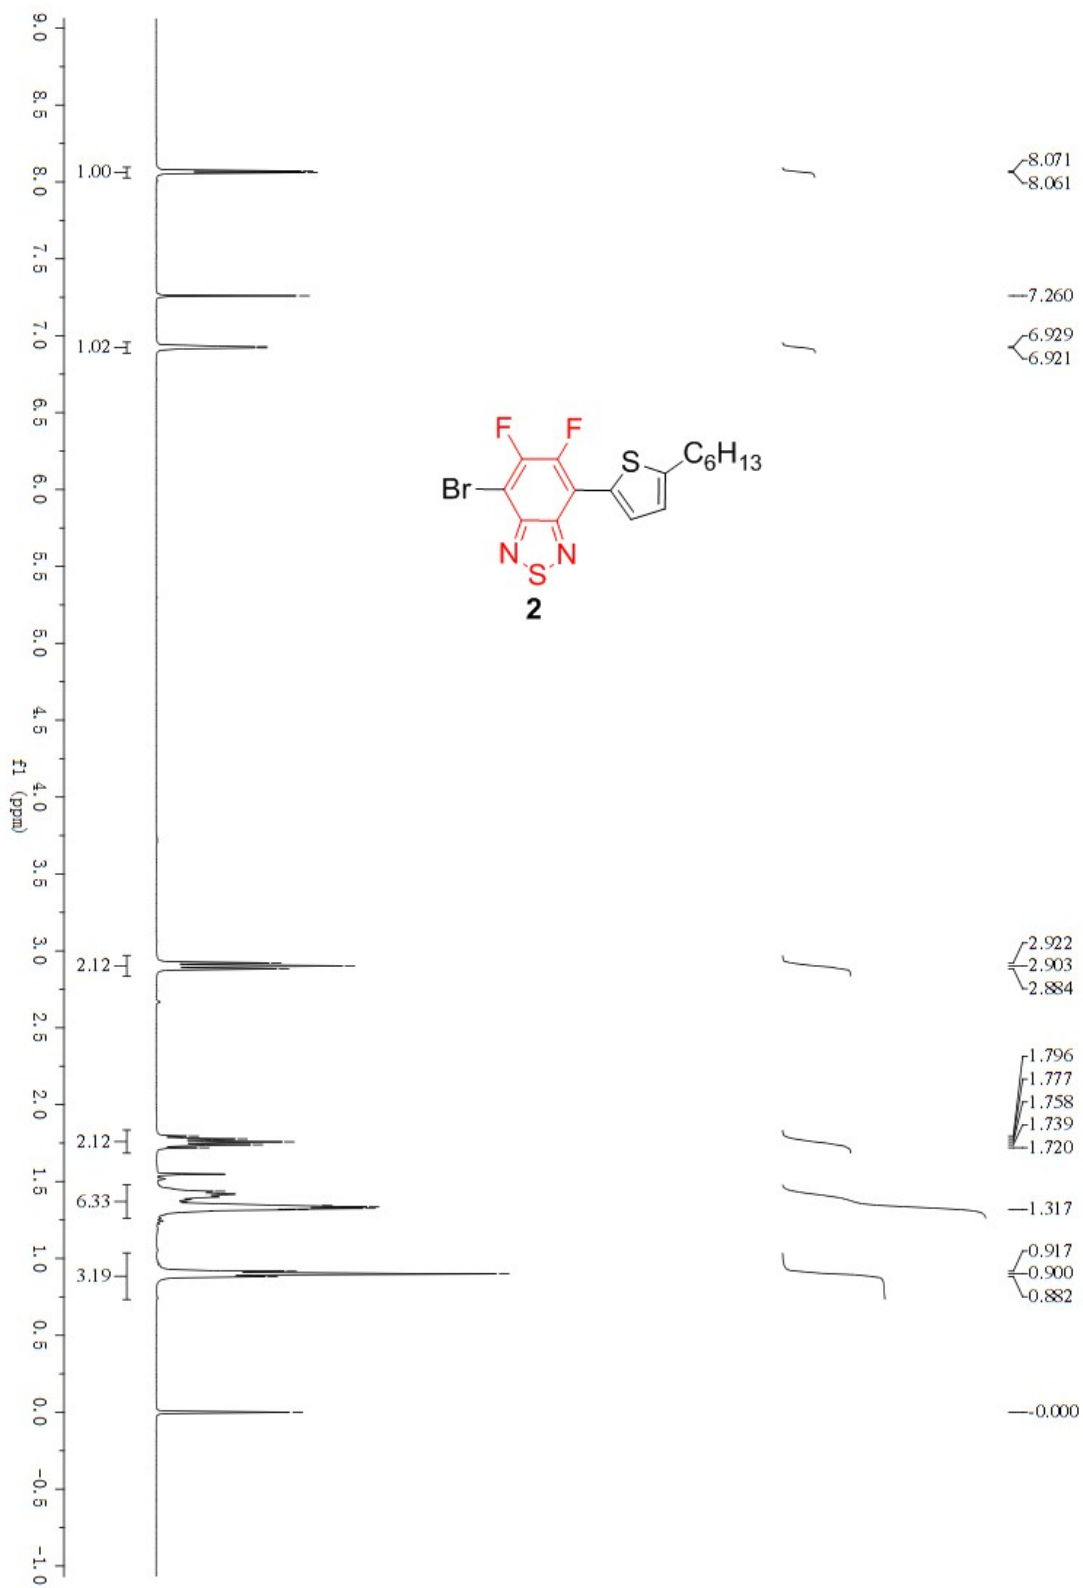

$^1\text{H}$  NMR spectrum of **2** in  $\text{CDCl}_3$ .

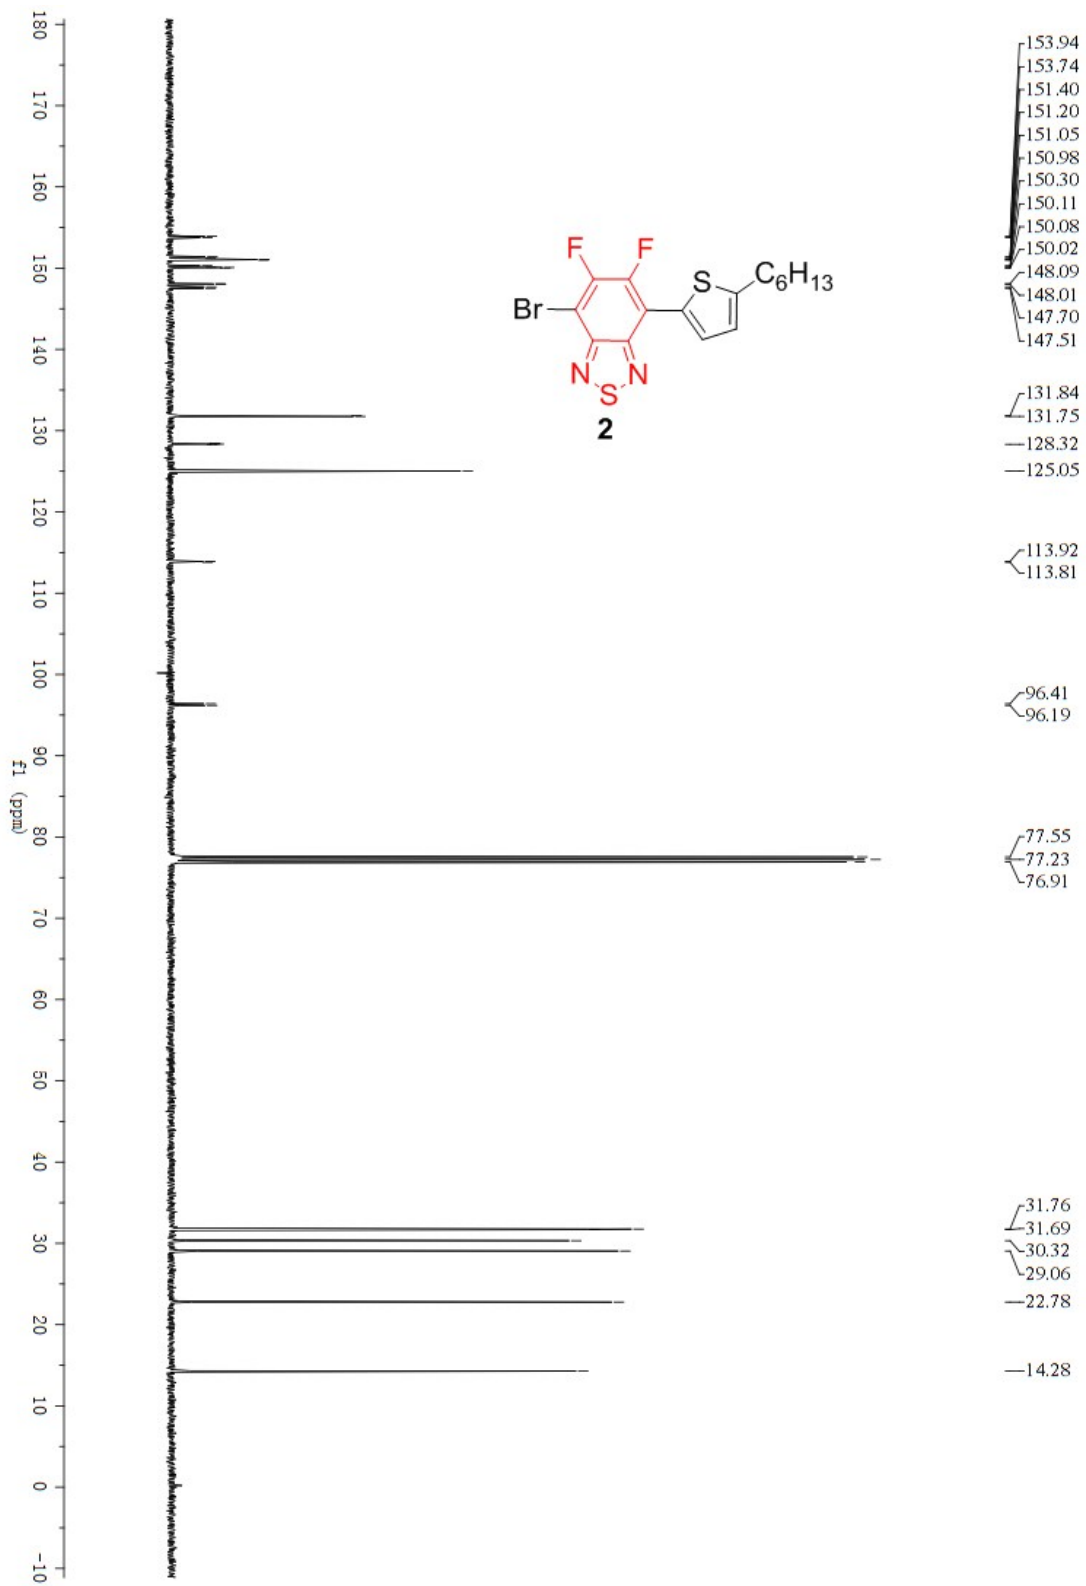

<sup>13</sup>C NMR spectrum of **2** in CDCl<sub>3</sub>.

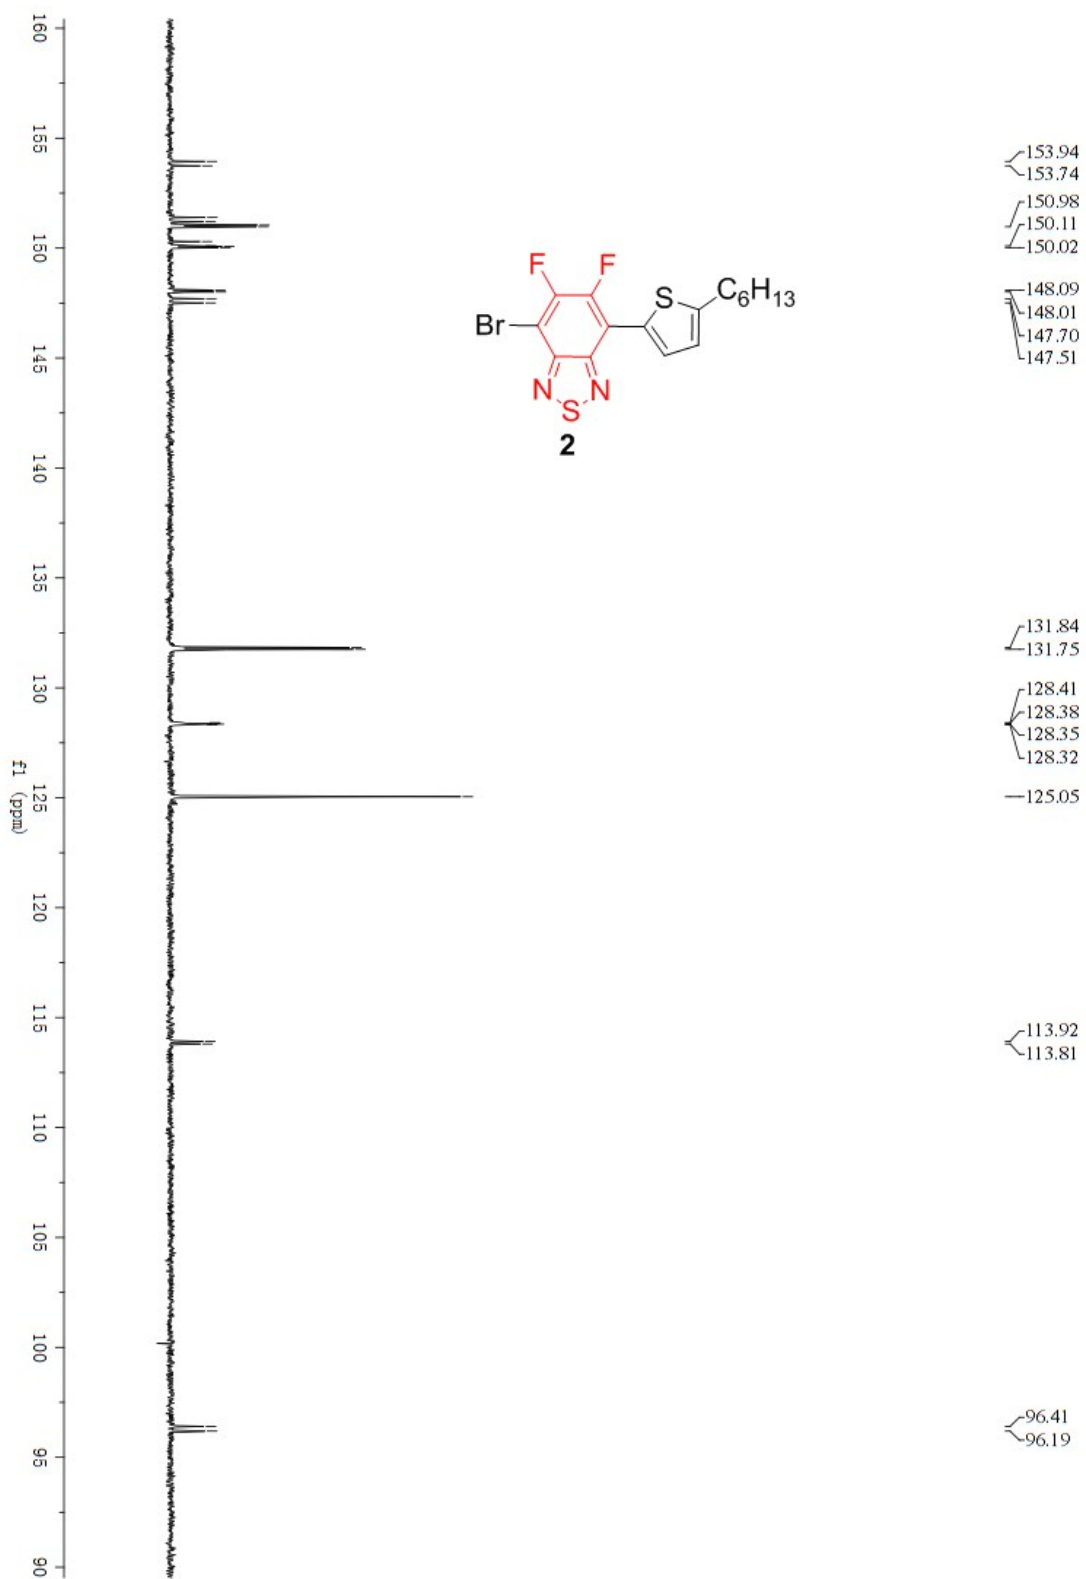

The expanded  $^{13}\text{C}$  NMR spectrum of **2** in  $\text{CDCl}_3$ .

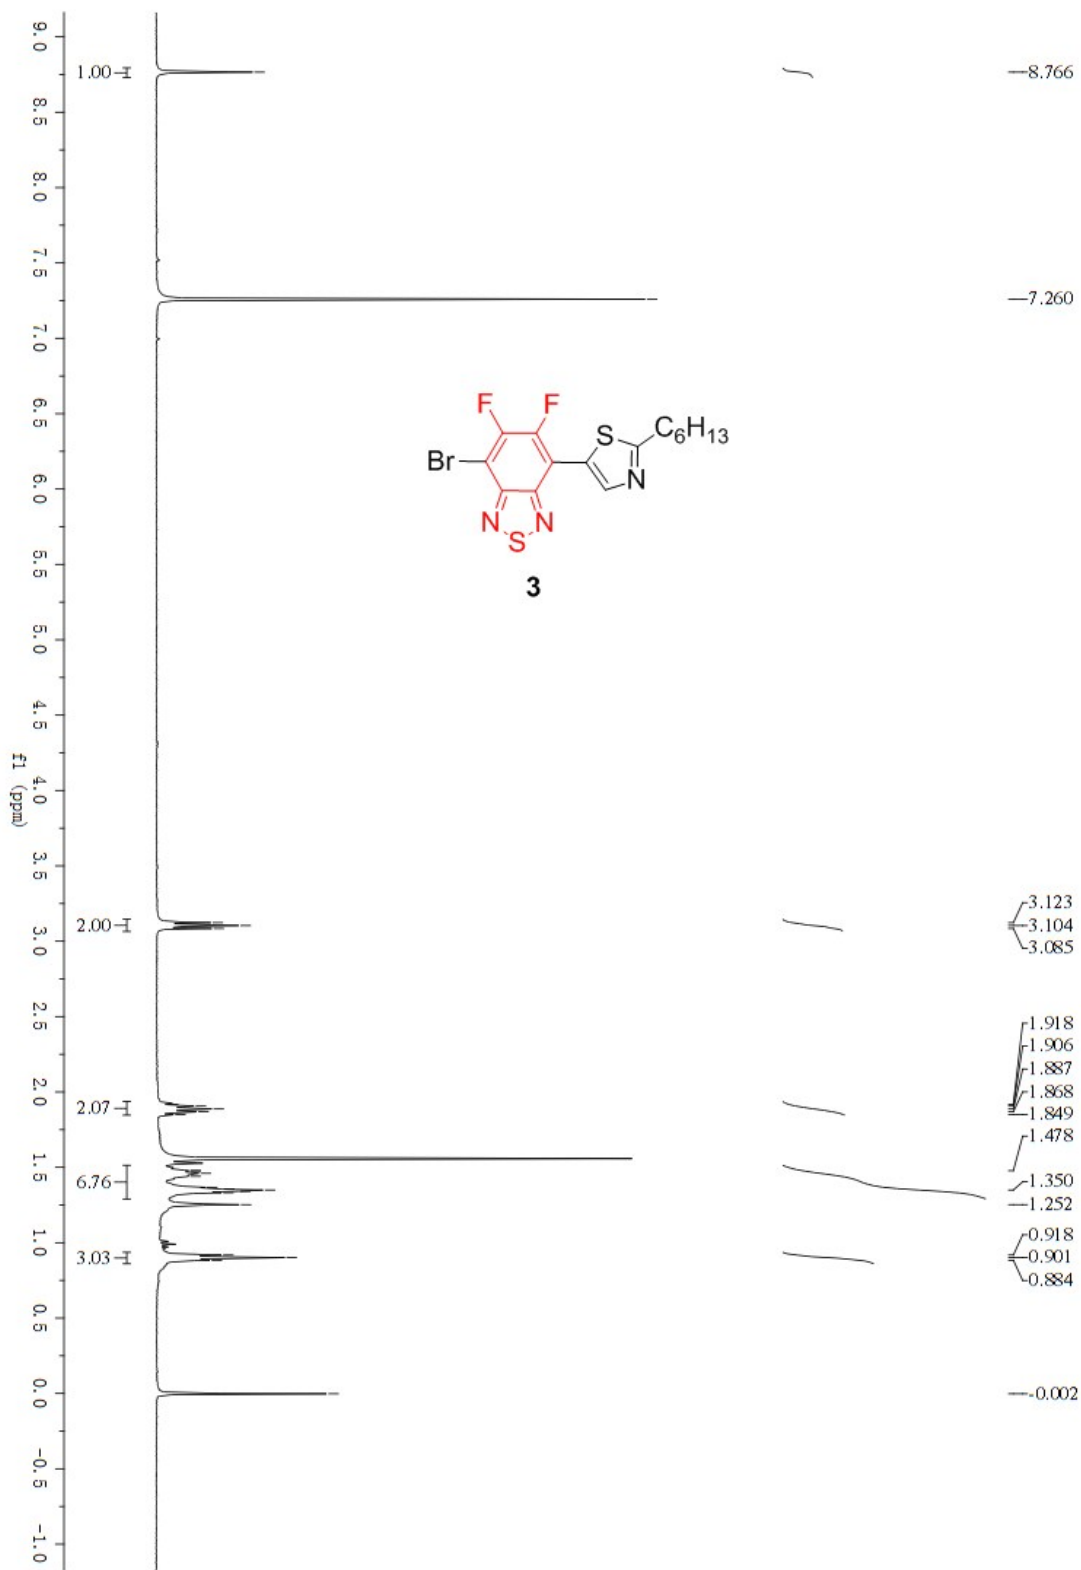

$^1\text{H}$  NMR spectrum of **3** in  $\text{CDCl}_3$ .

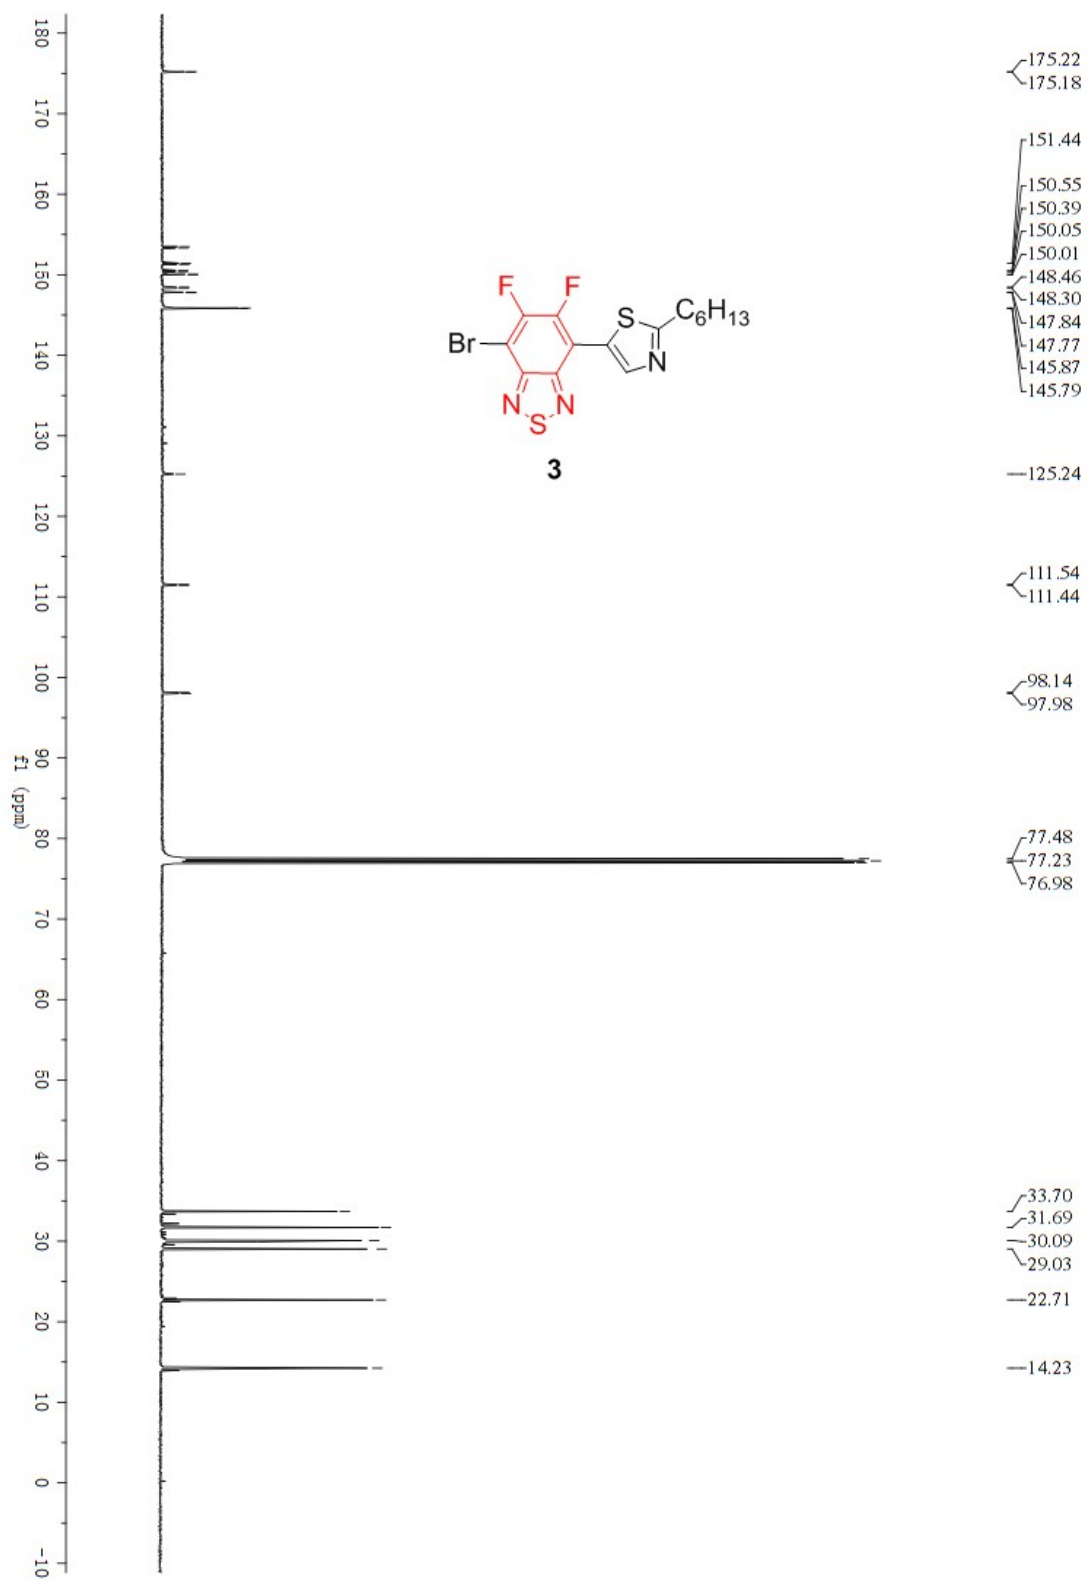

<sup>13</sup>C NMR spectrum of **3** in CDCl<sub>3</sub>.



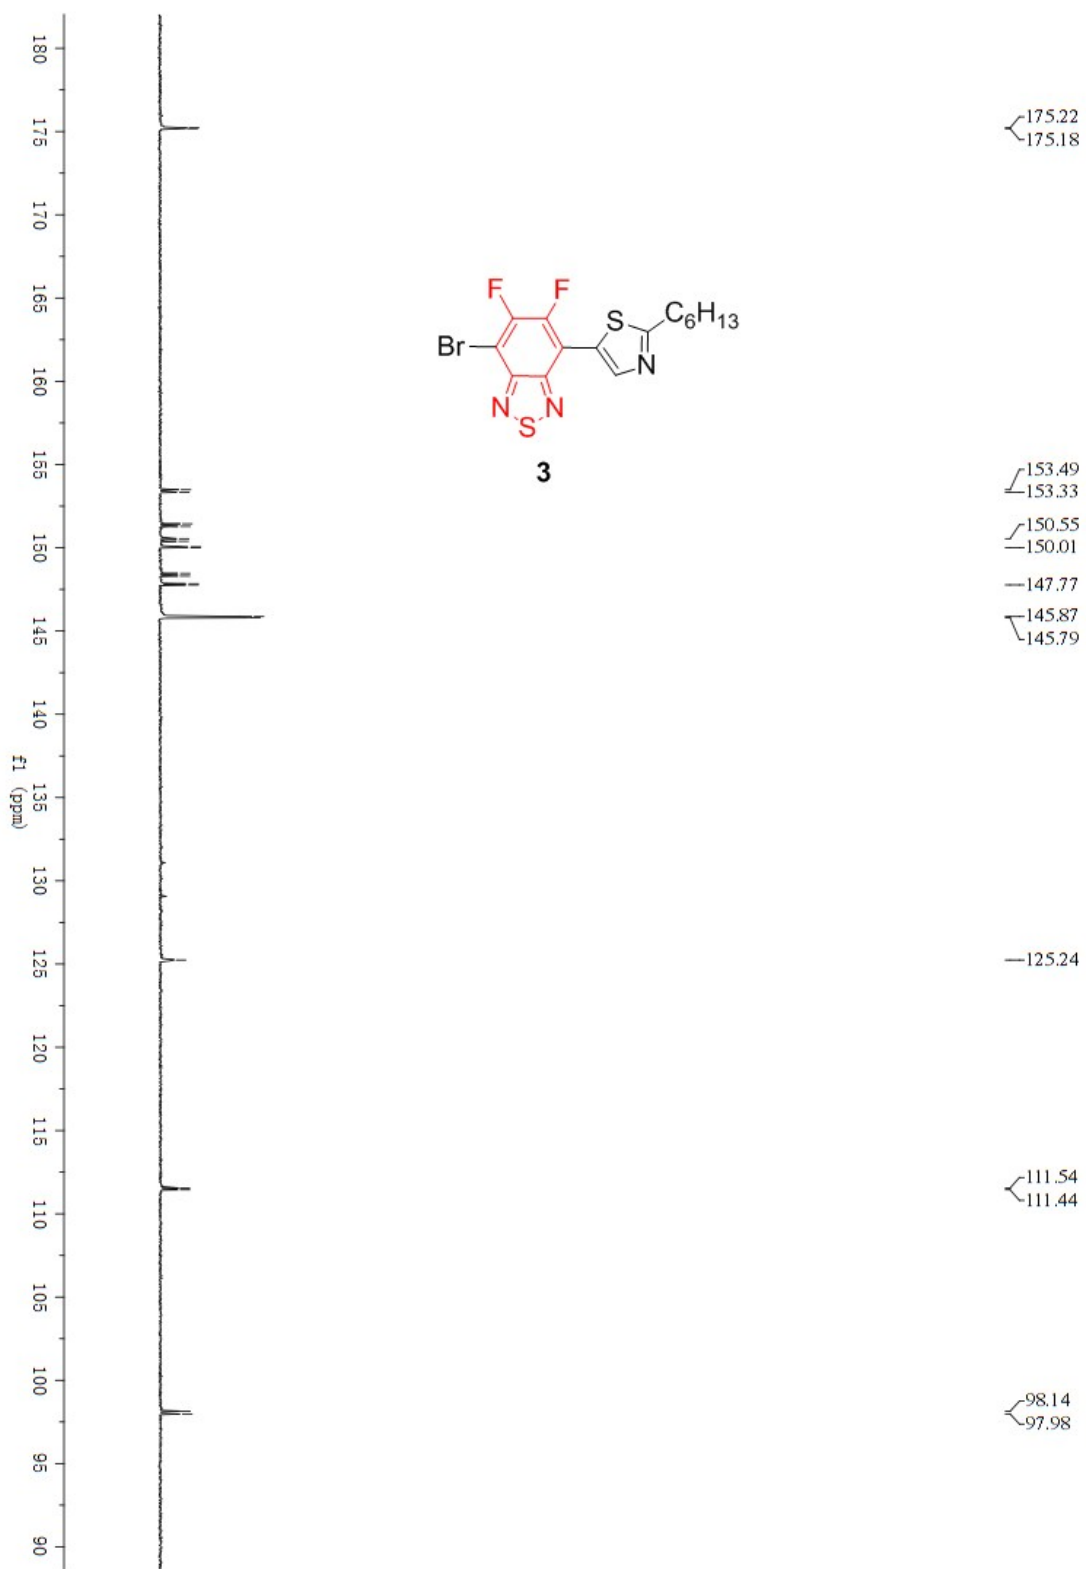

The expanded  $^{13}\text{C}$  NMR spectrum of **3** in  $\text{CDCl}_3$ .

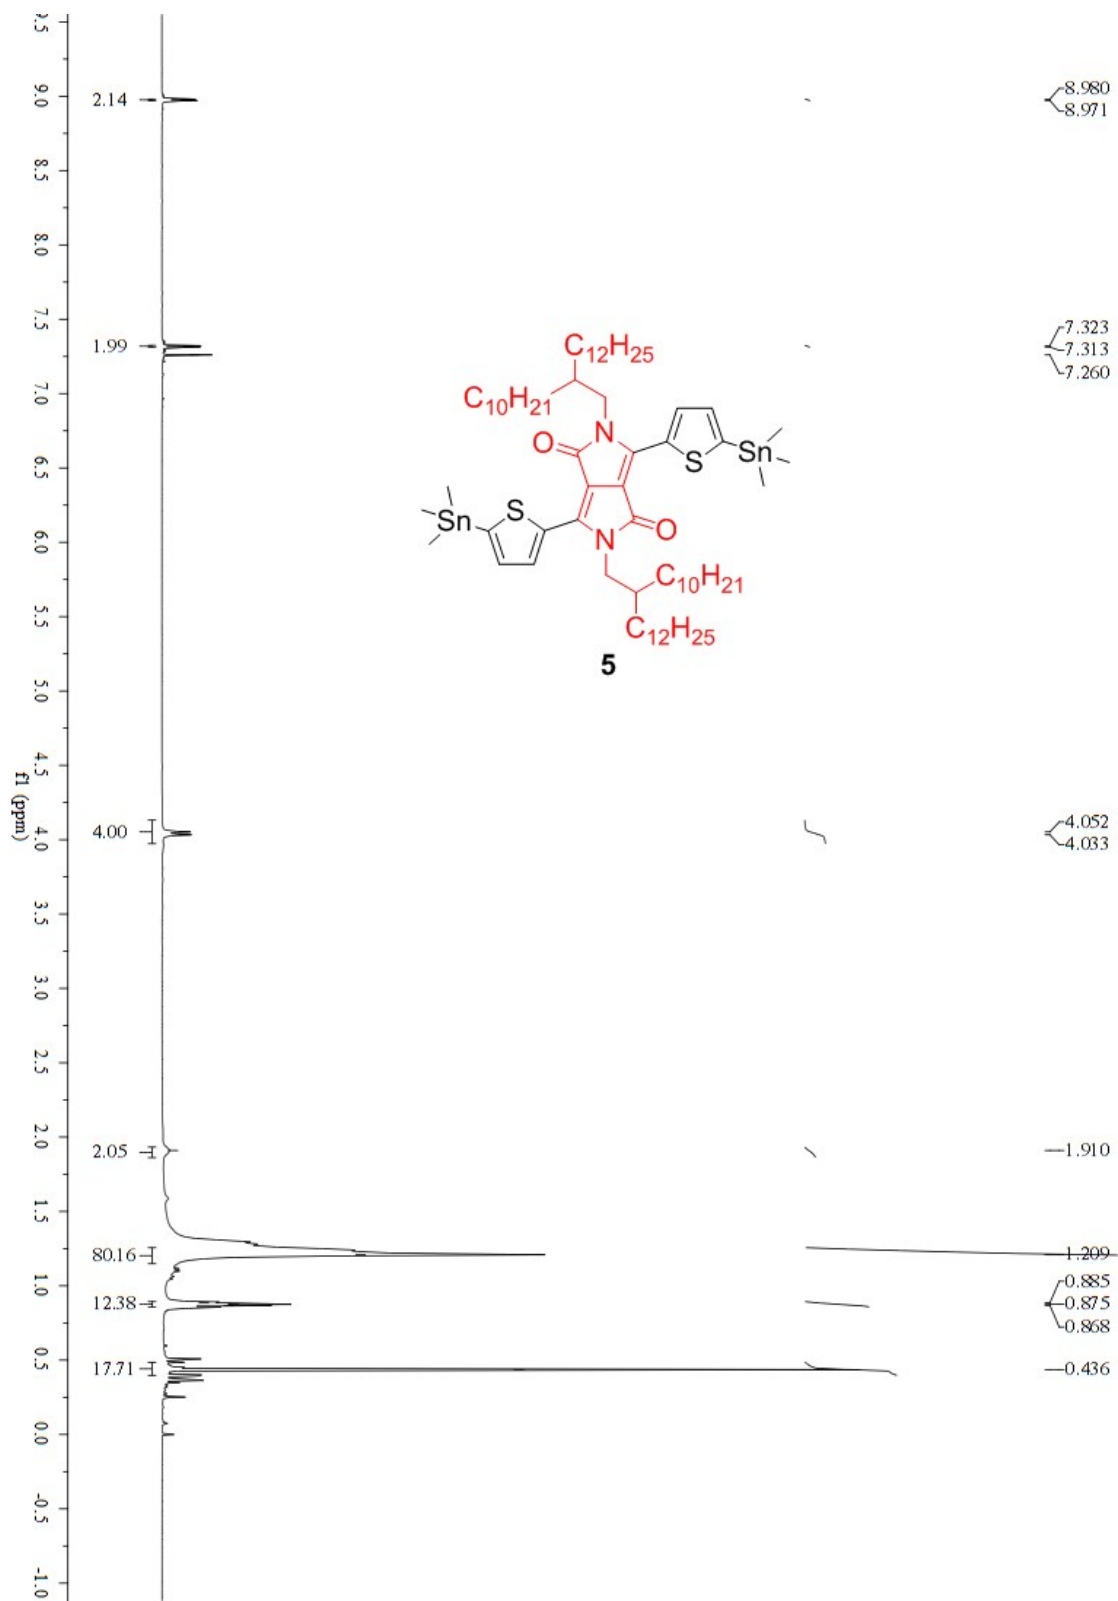

$^1\text{H}$  NMR spectrum of **5** in  $\text{CDCl}_3$ .

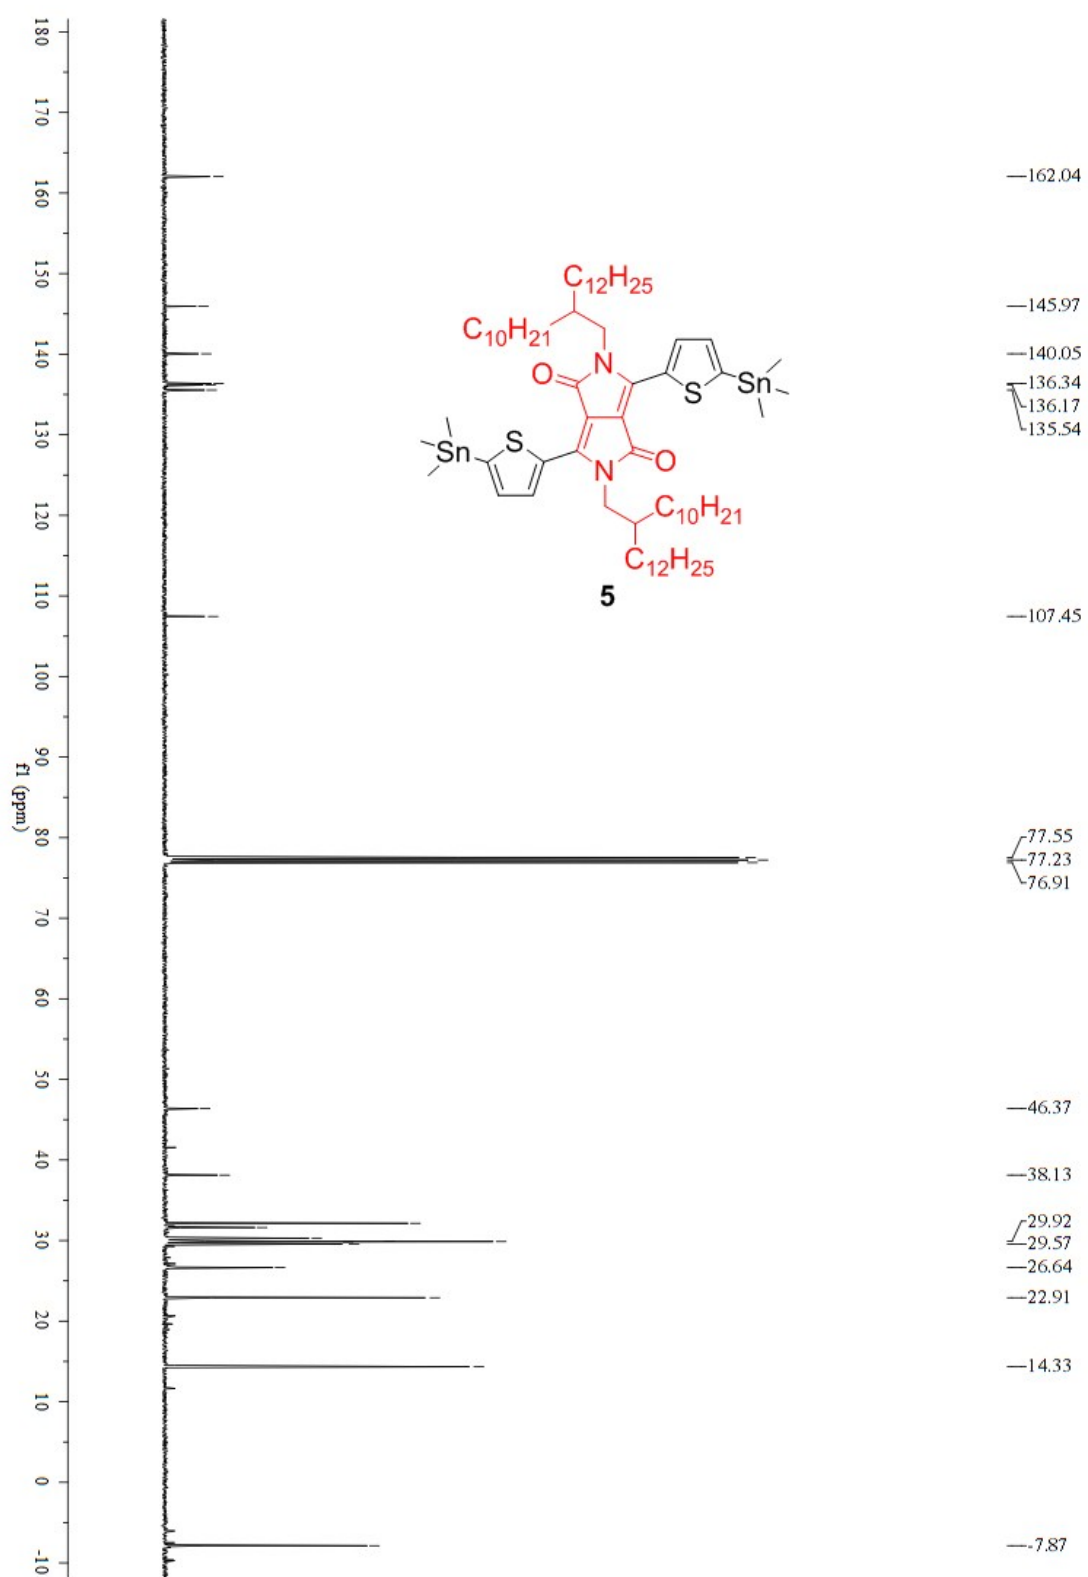

$^{13}\text{C}$  NMR spectrum of **5** in  $\text{CDCl}_3$ .

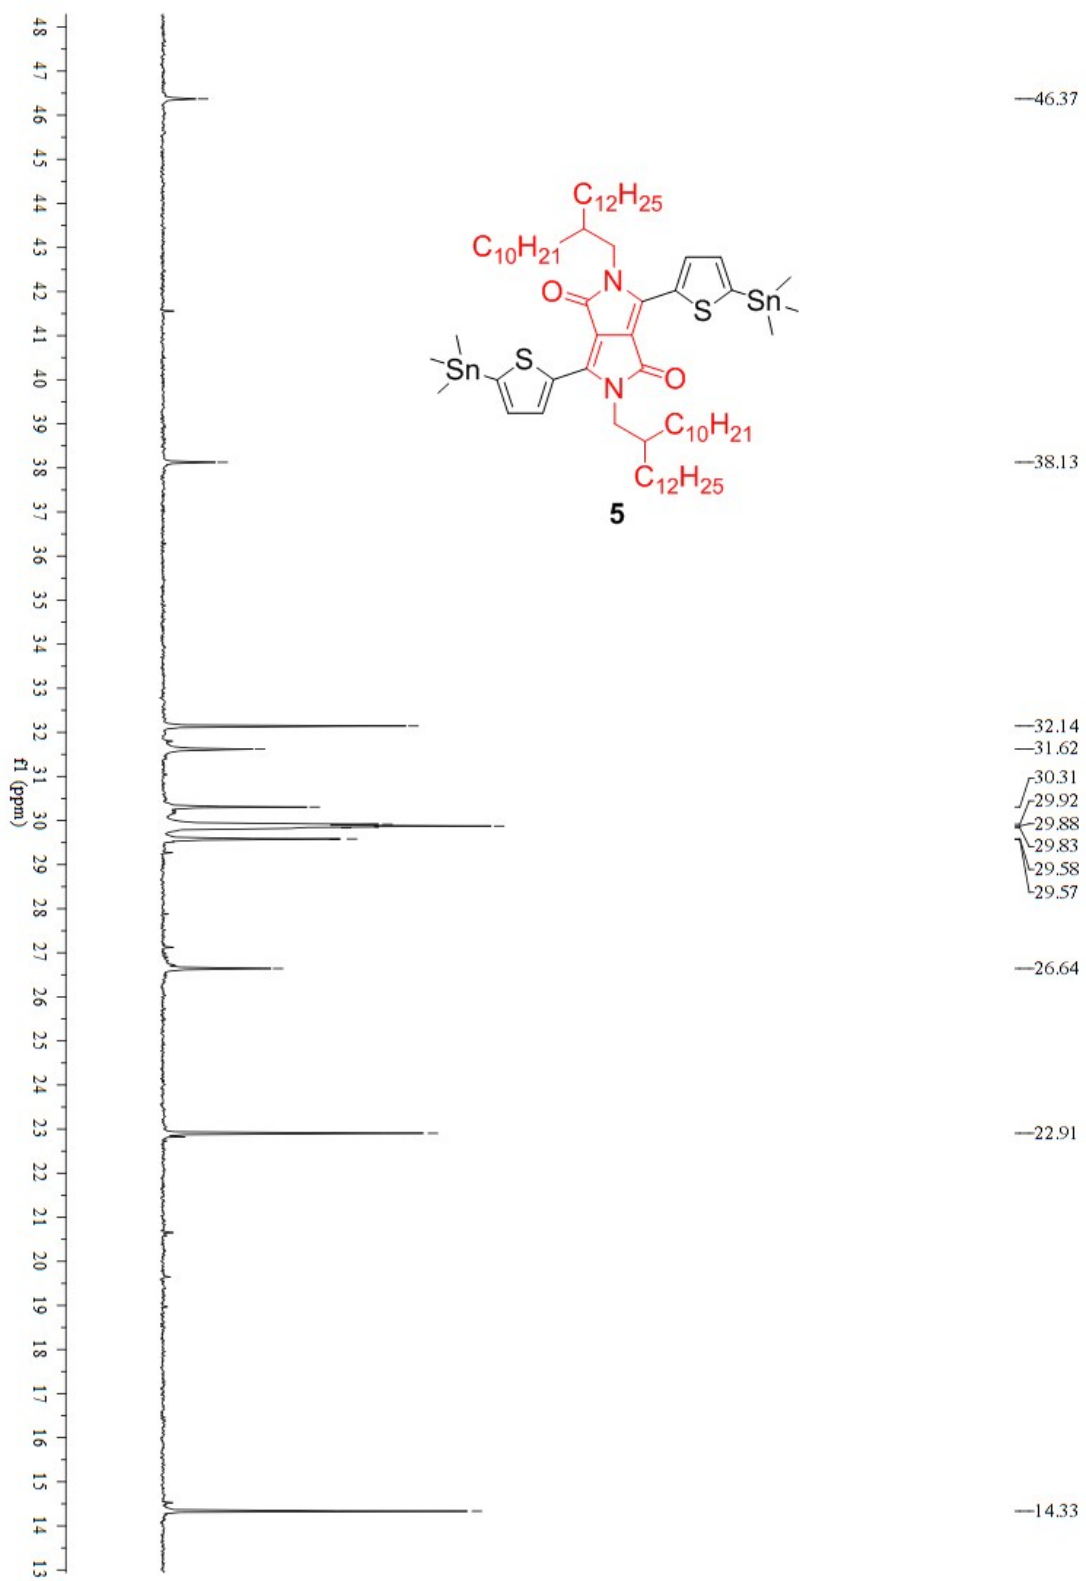

The expanded  $^{13}\text{C}$  NMR spectrum of **5** in  $\text{CDCl}_3$ .

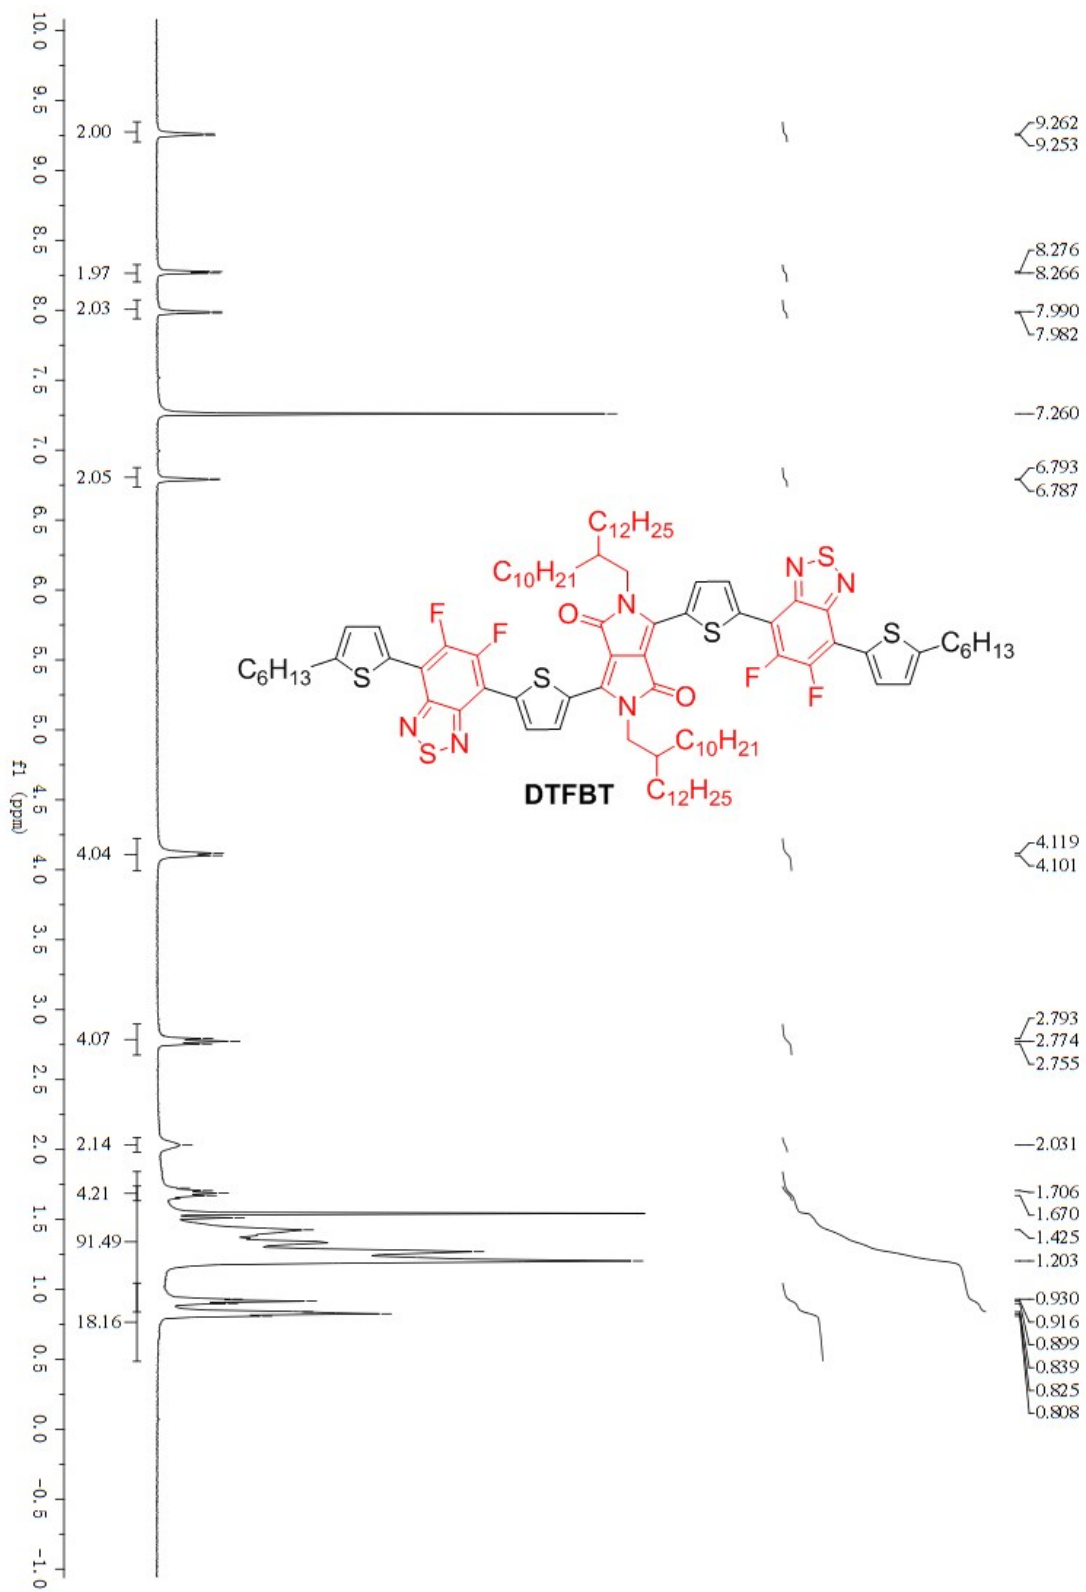

$^1\text{H}$  NMR spectrum of DTFBT in  $\text{CDCl}_3$ .

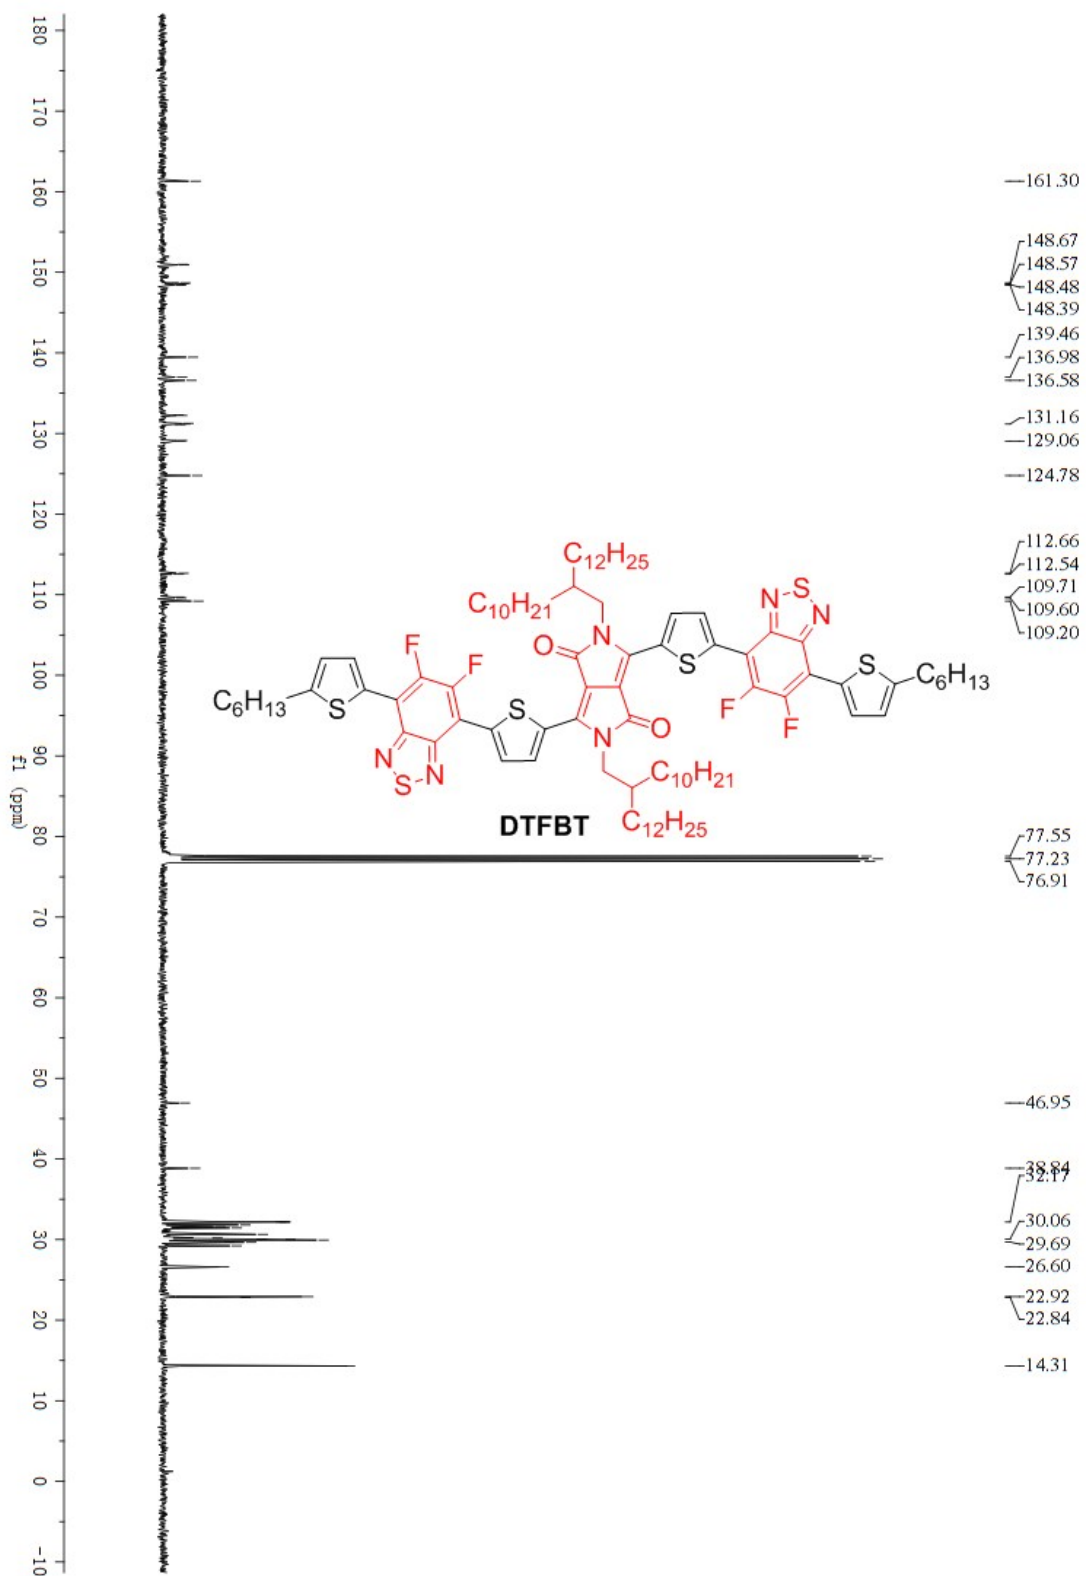

$^{13}C$  NMR spectrum of DTFBT in  $CDCl_3$ .

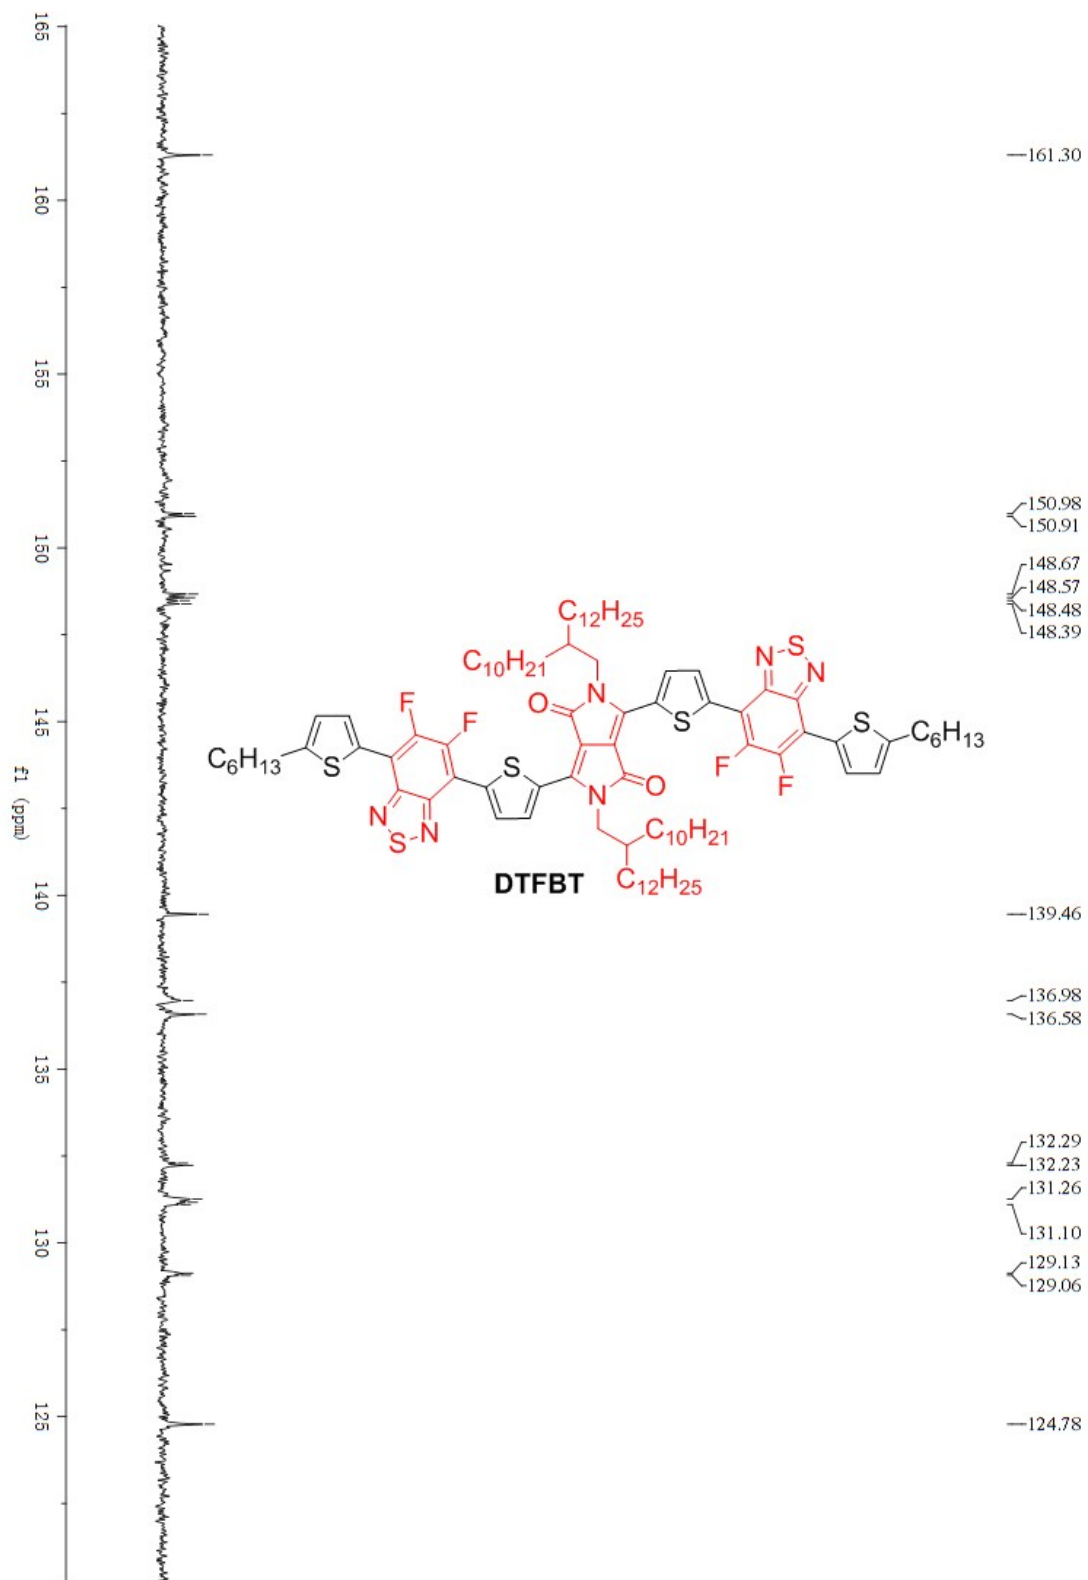

The expanded  $^{13}\text{C}$  NMR spectrum of **DTFBT** in  $\text{CDCl}_3$ .

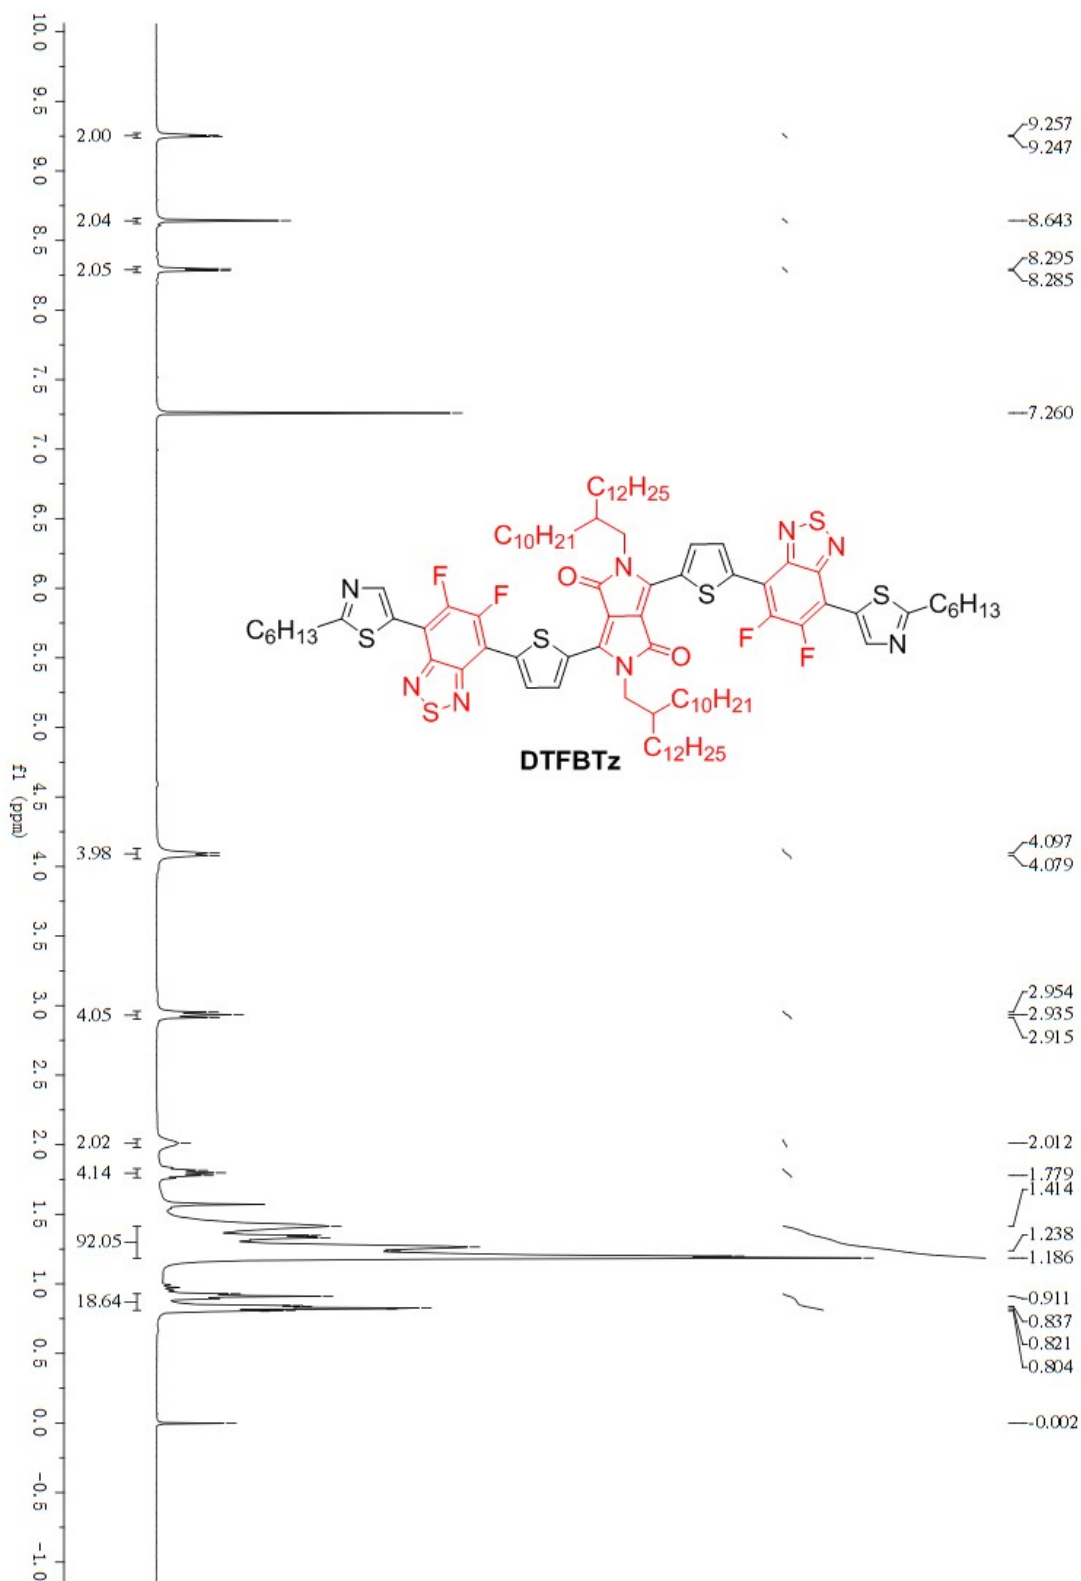

<sup>1</sup>H NMR spectrum of DTFBTz in CDCl<sub>3</sub>.



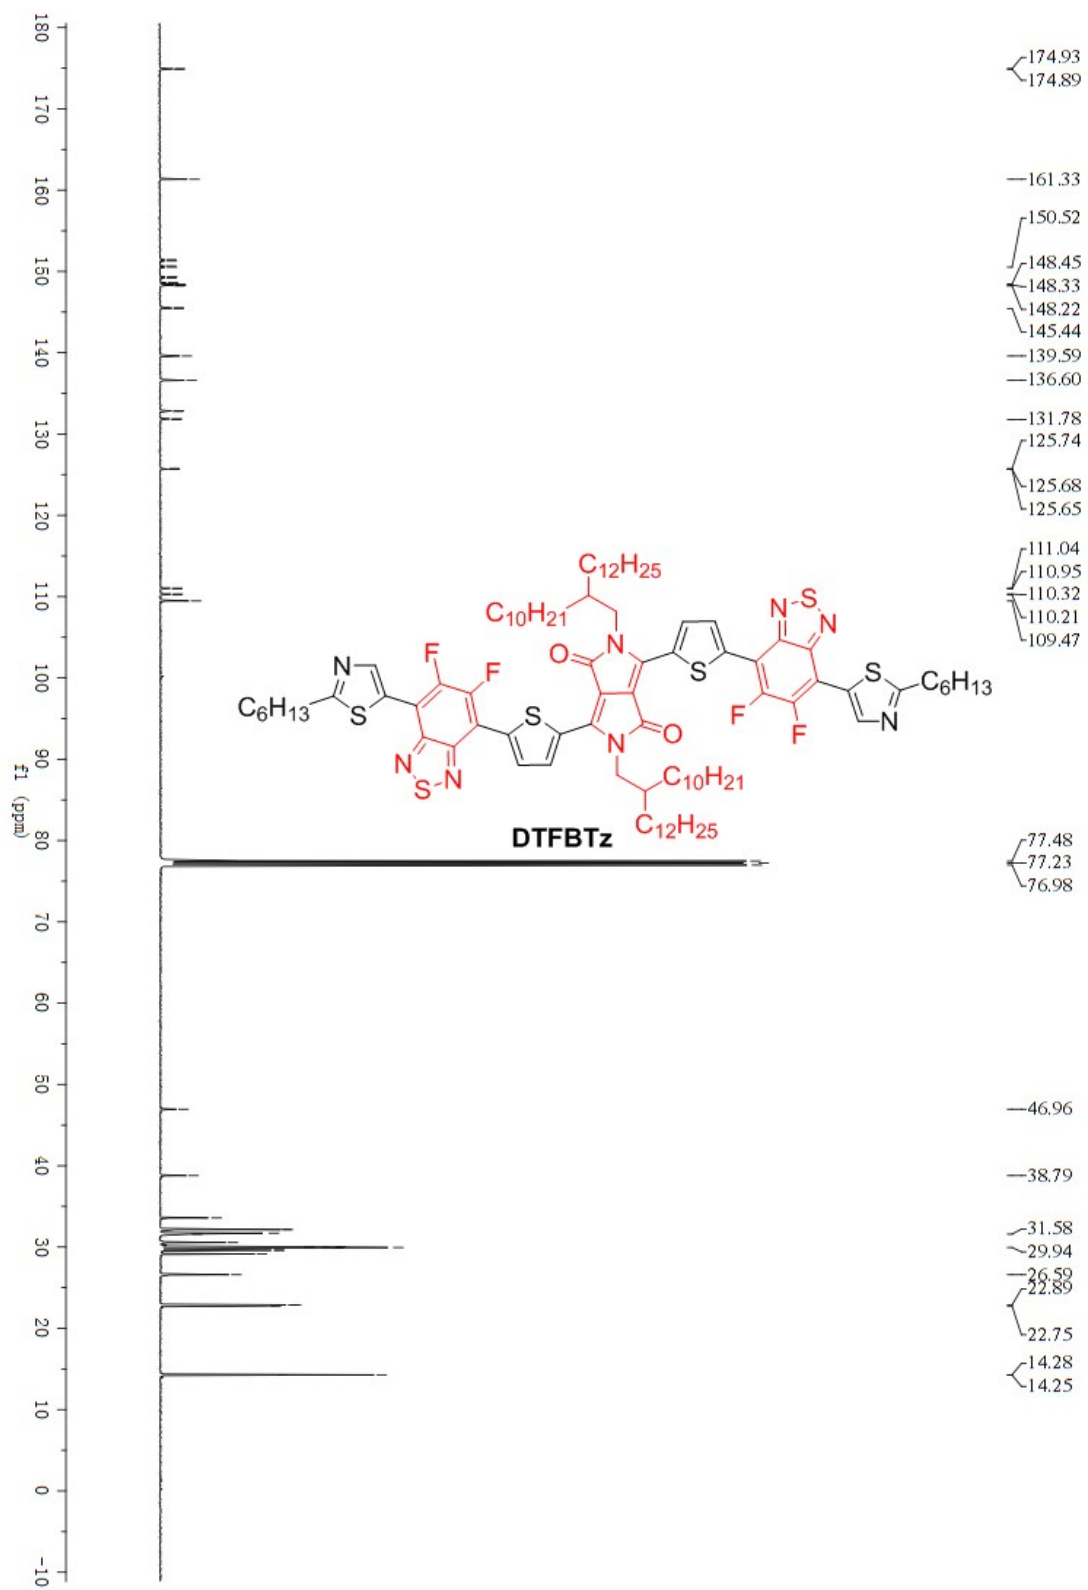

<sup>13</sup>C NMR spectrum of DTFBTz in CDCl<sub>3</sub>.

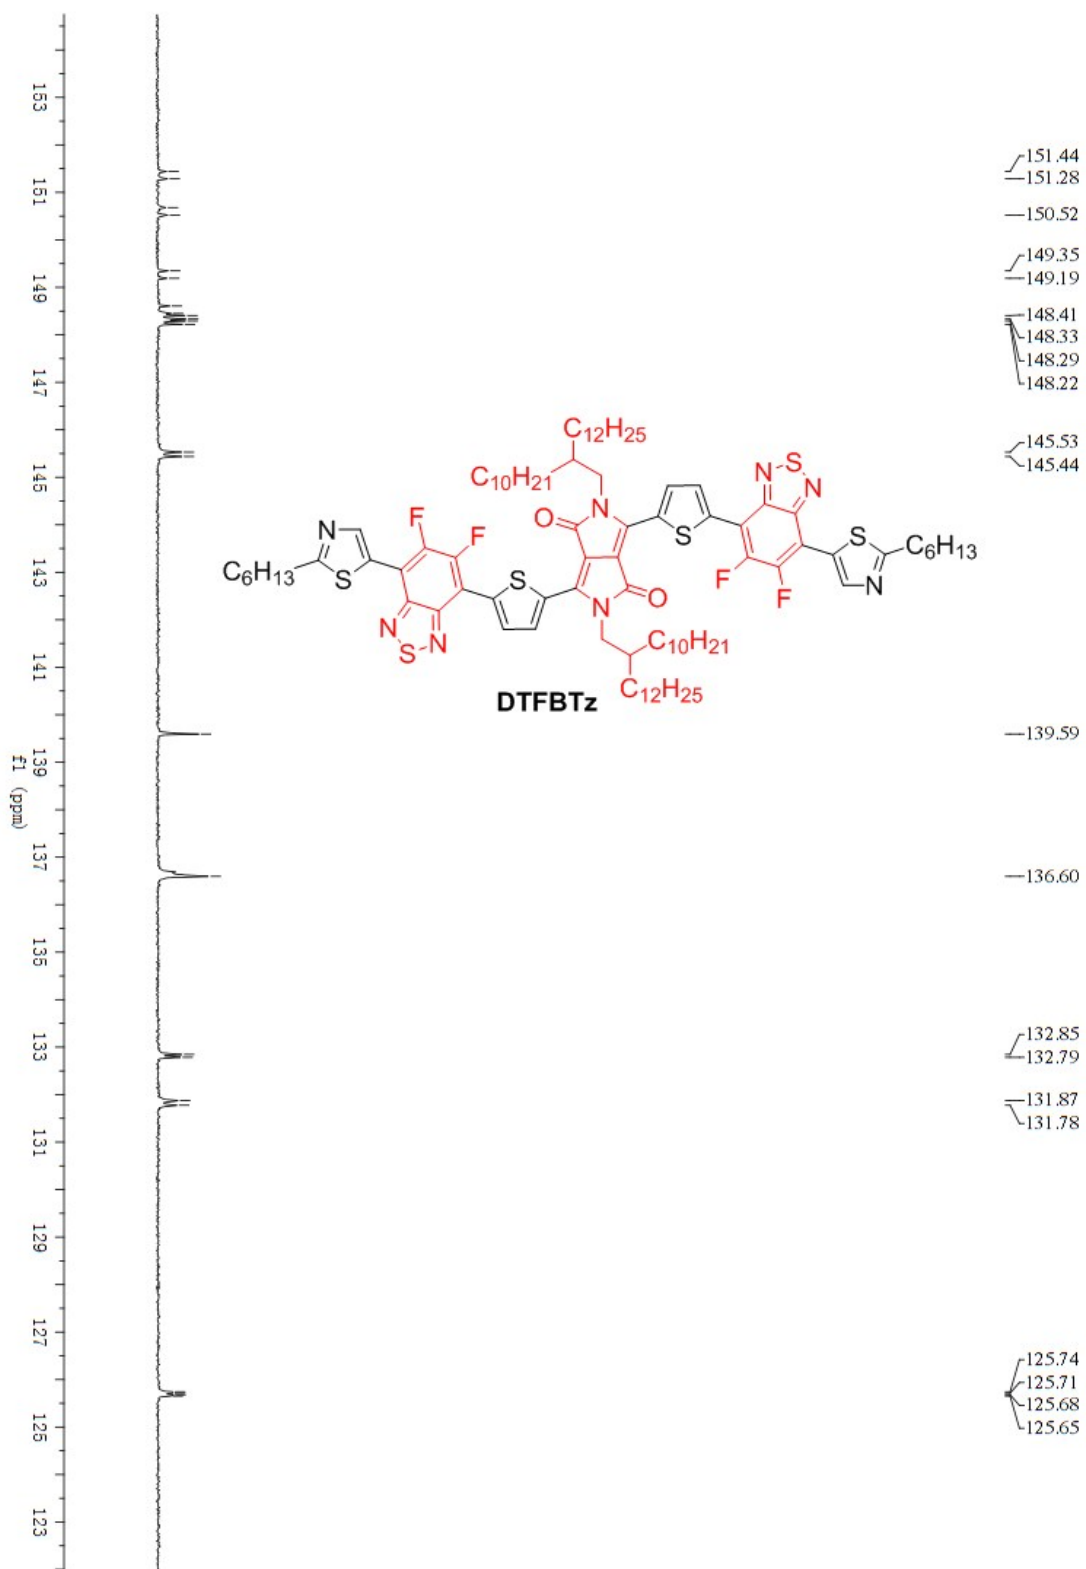

The expanded  $^{13}\text{C}$  NMR spectrum of DTFBTz in  $\text{CDCl}_3$ .

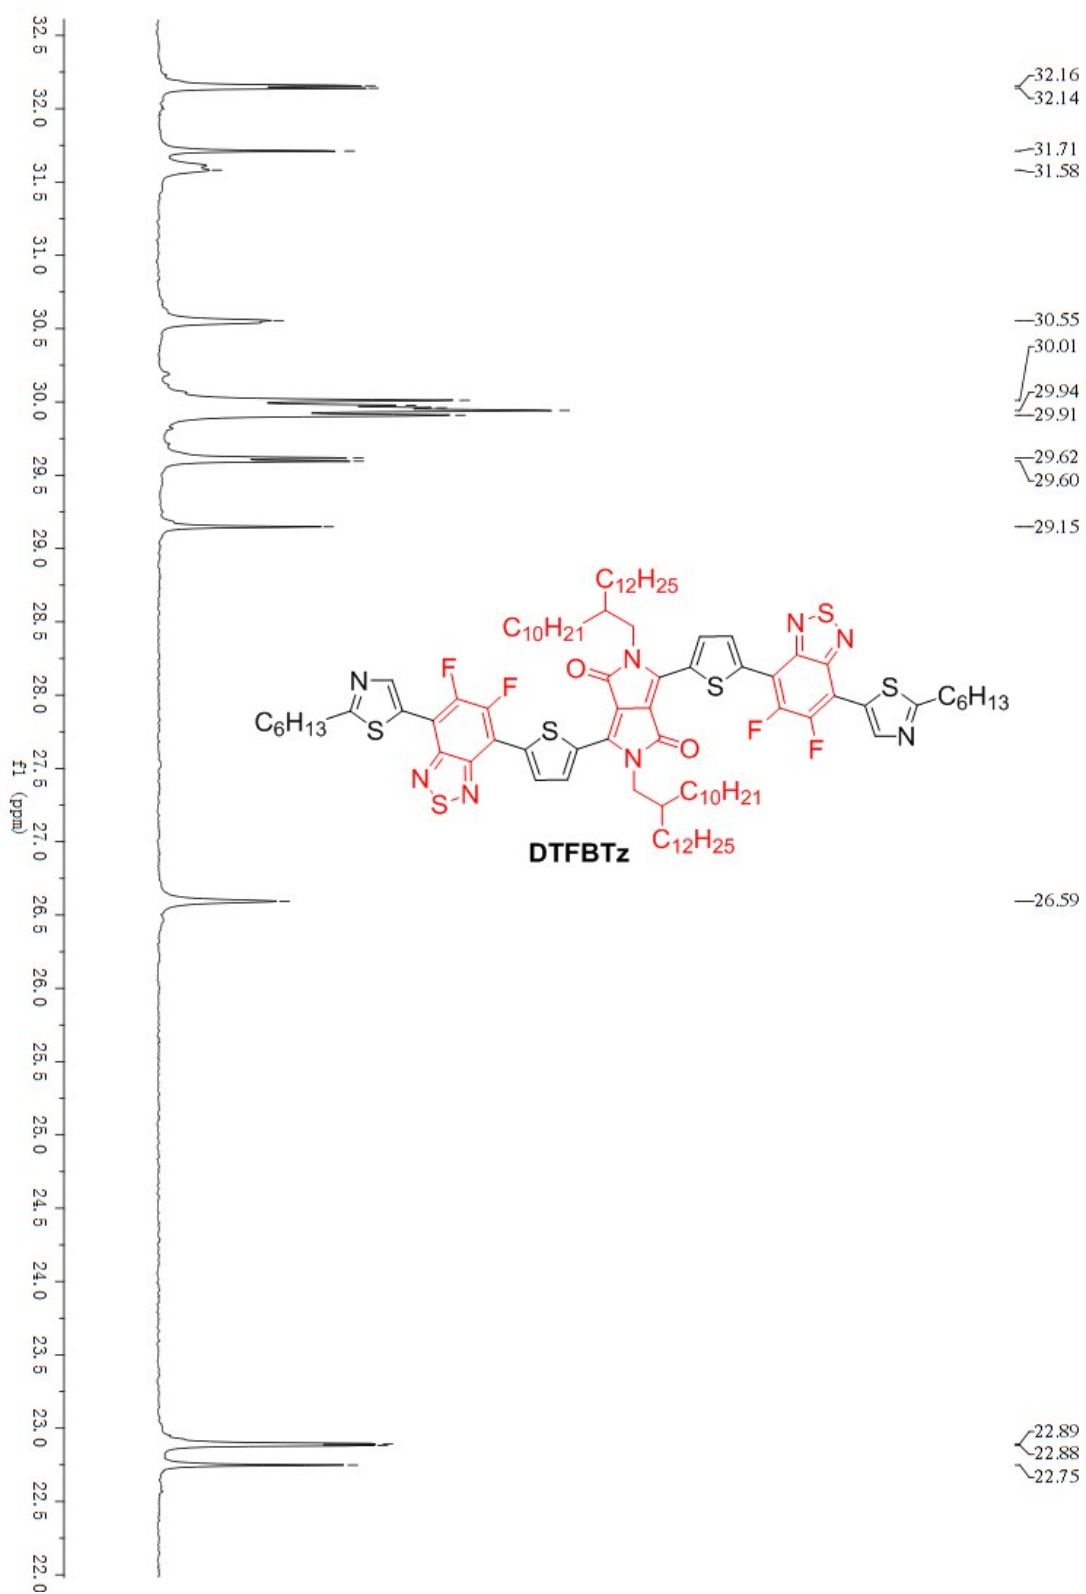

The expanded  $^{13}\text{C}$  NMR spectrum of **DTFBTz** in  $\text{CDCl}_3$ .

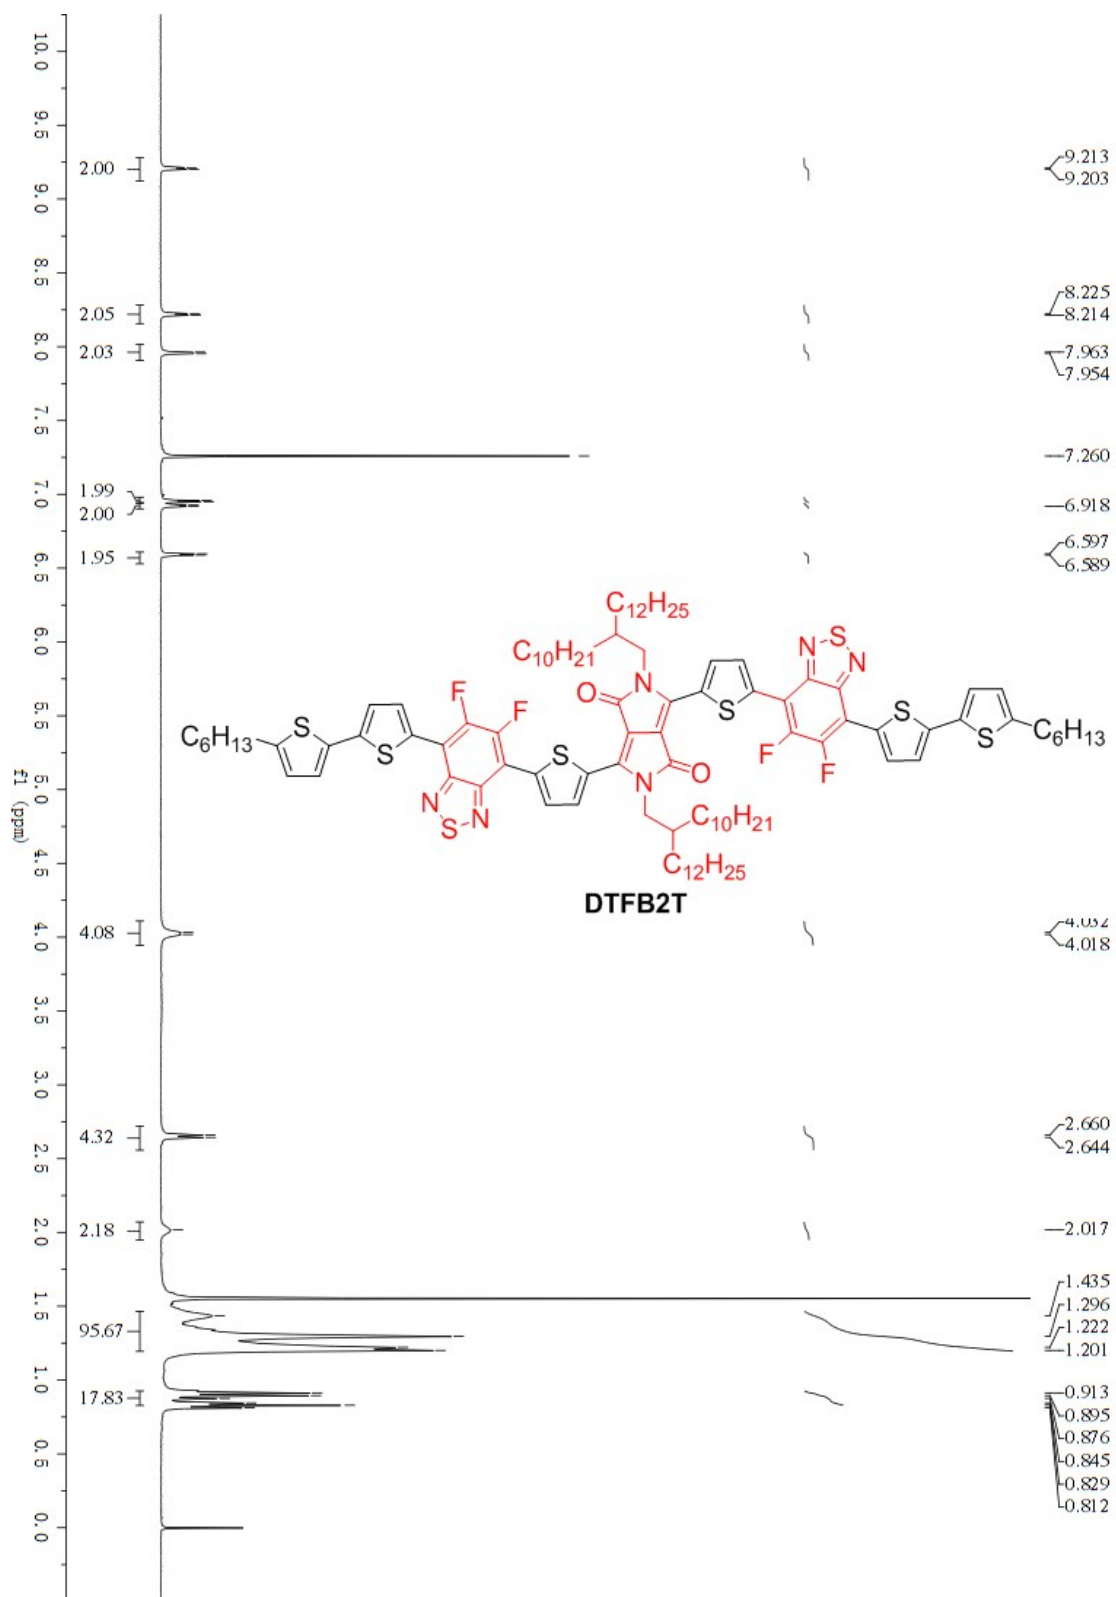

$^1\text{H}$  NMR spectrum of **DTFB2T** in  $\text{CDCl}_3$ .

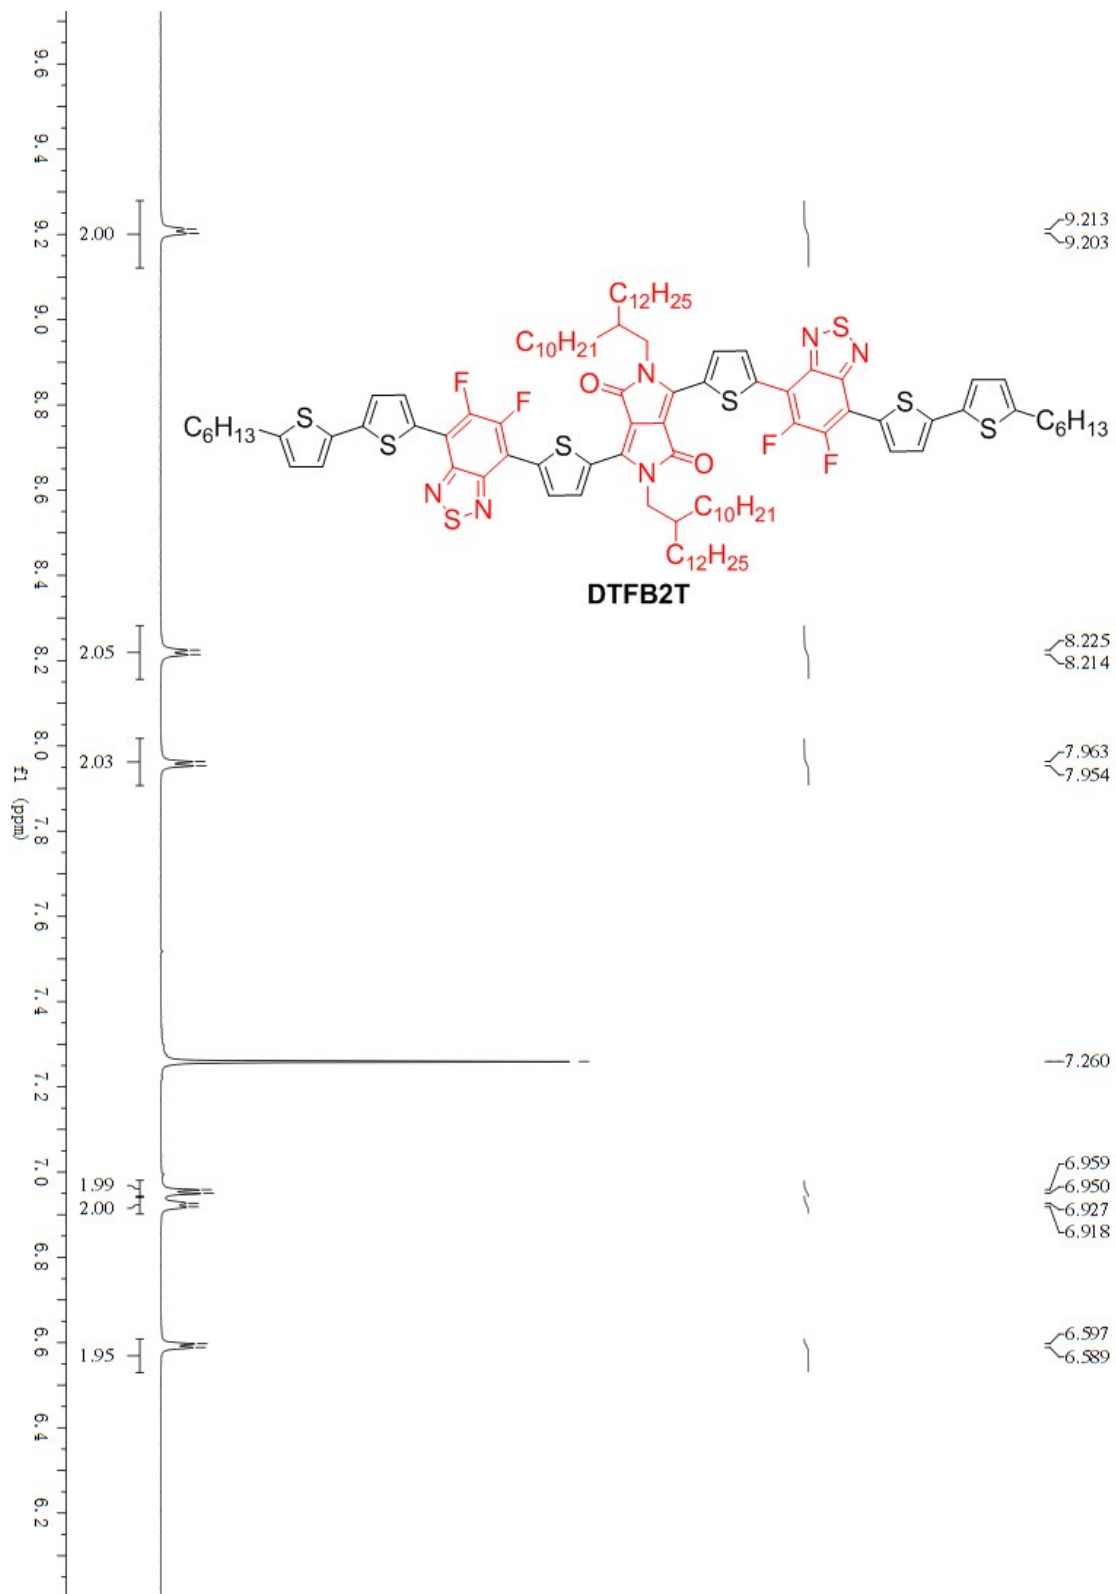

The expanded  $^1\text{H}$  NMR spectrum of **DTFB2T** in  $\text{CDCl}_3$ .

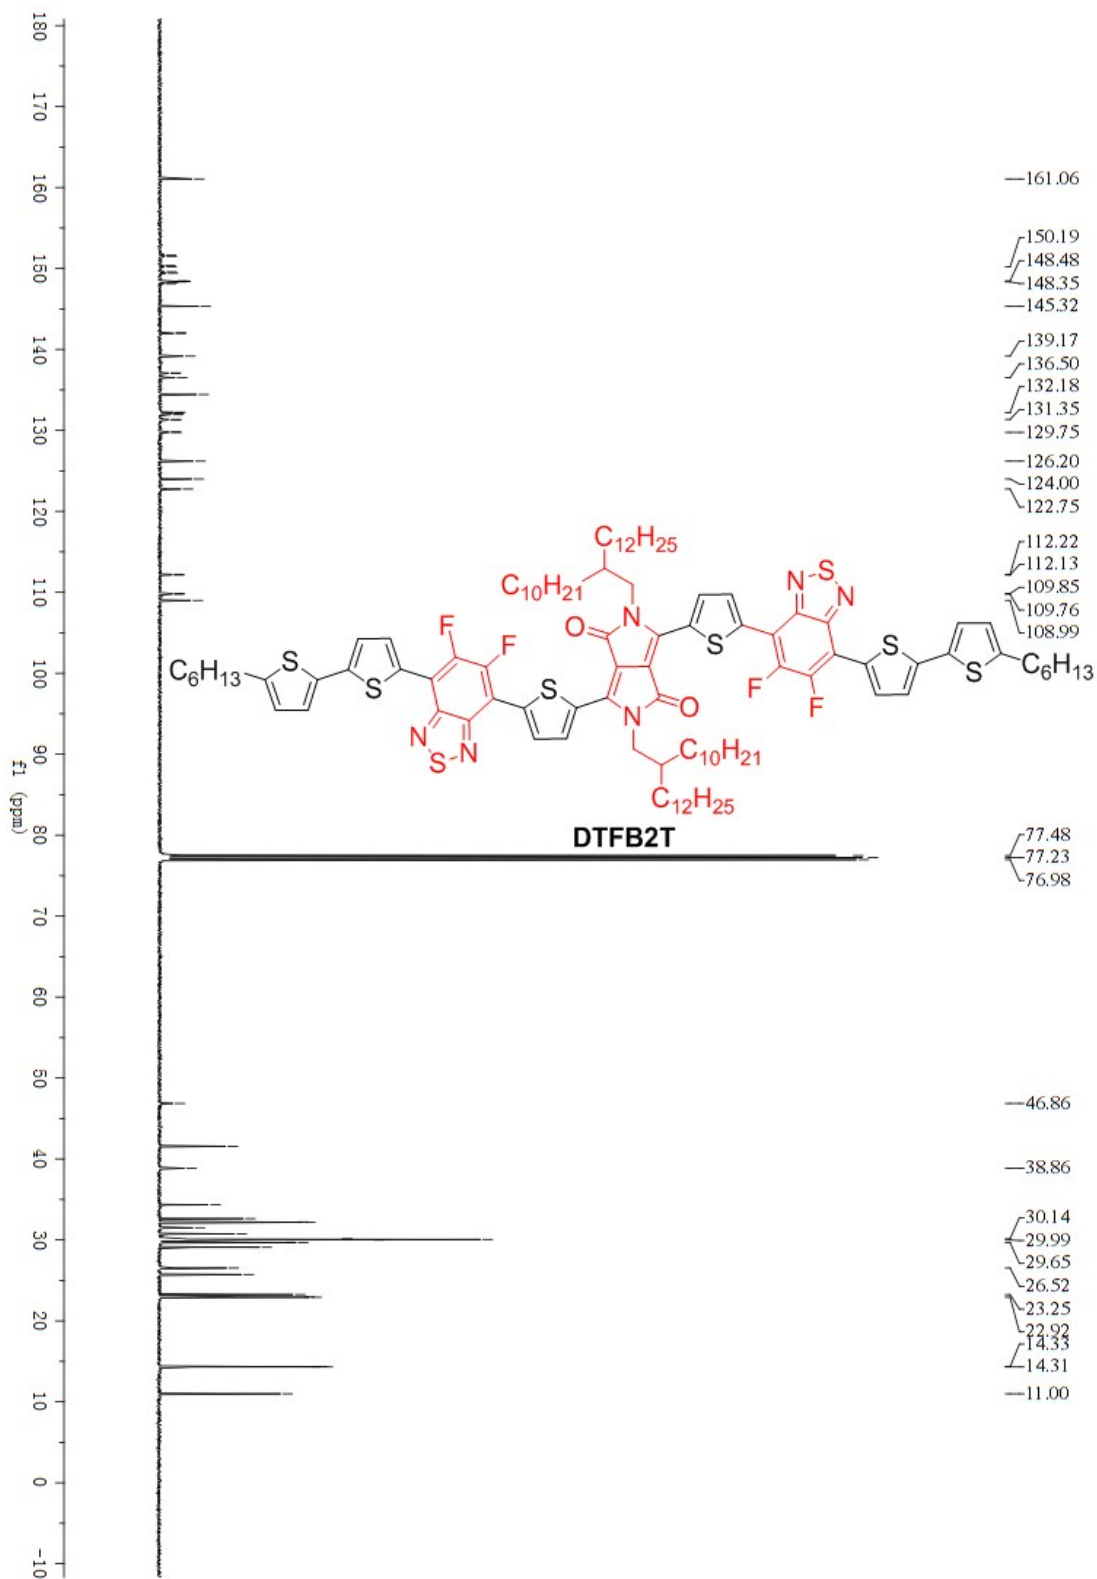

$^{13}\text{C}$  NMR spectrum of **DTFB2T** in  $\text{CDCl}_3$ .

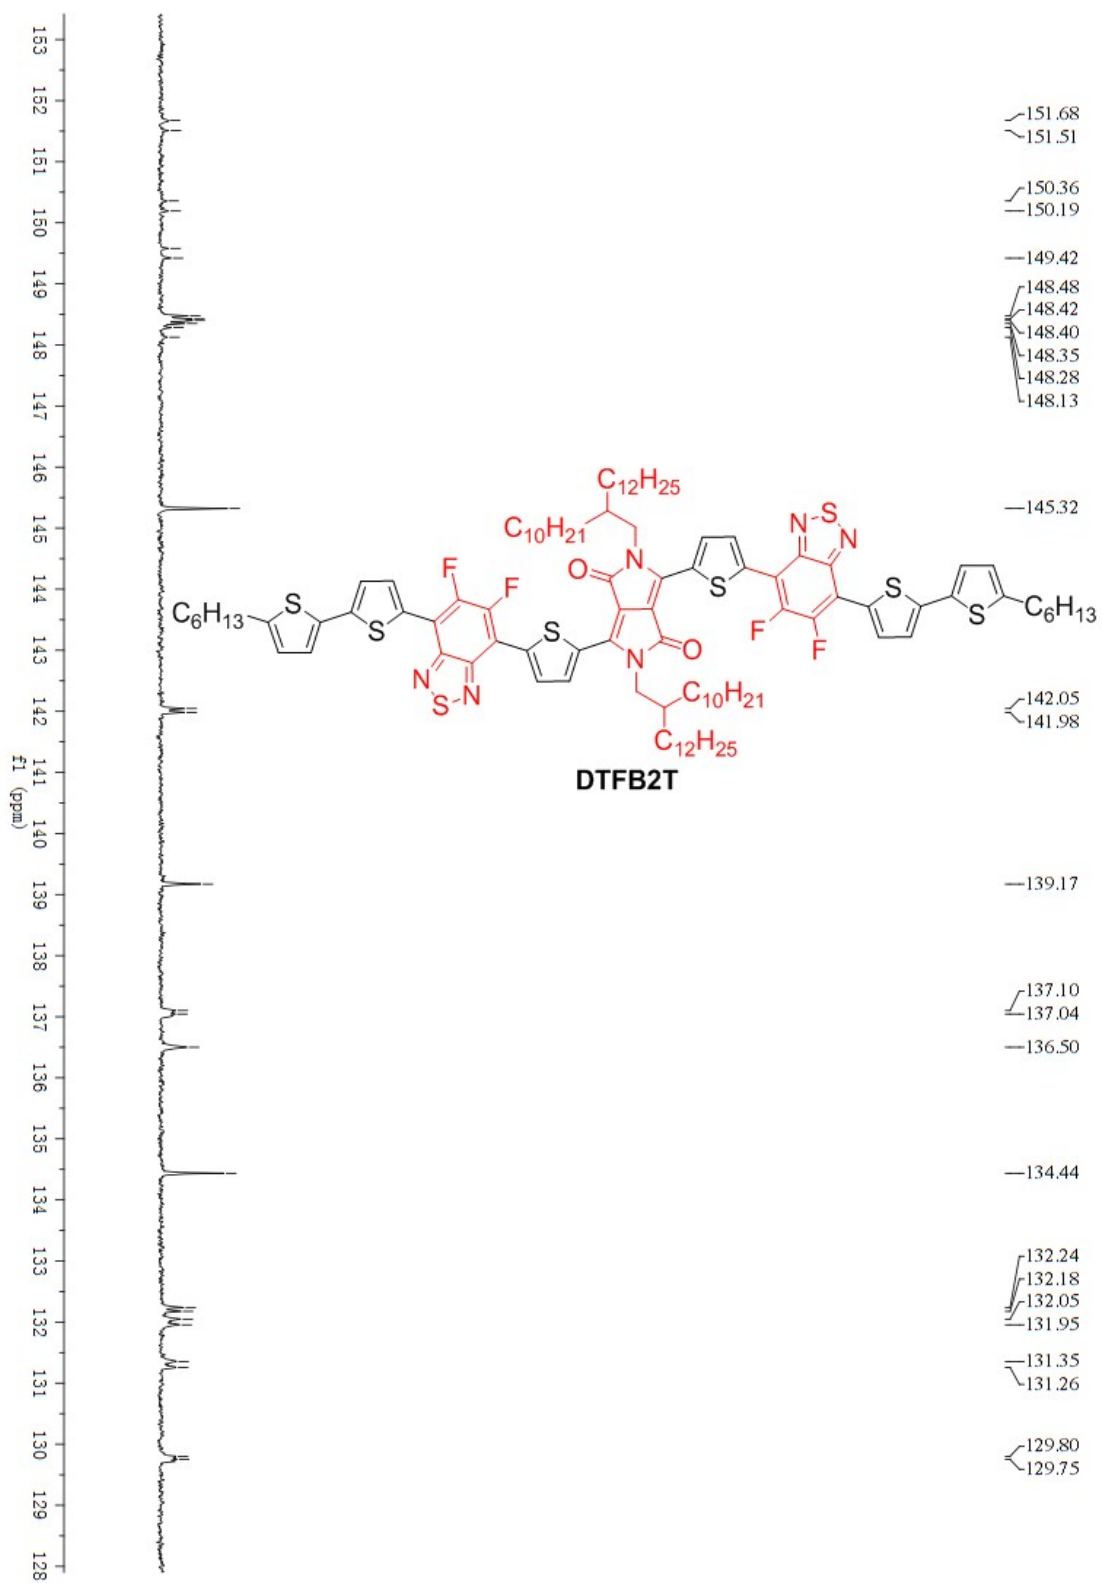

The expanded  $^{13}\text{C}$  NMR spectrum of **DTFB2T** in  $\text{CDCl}_3$ .

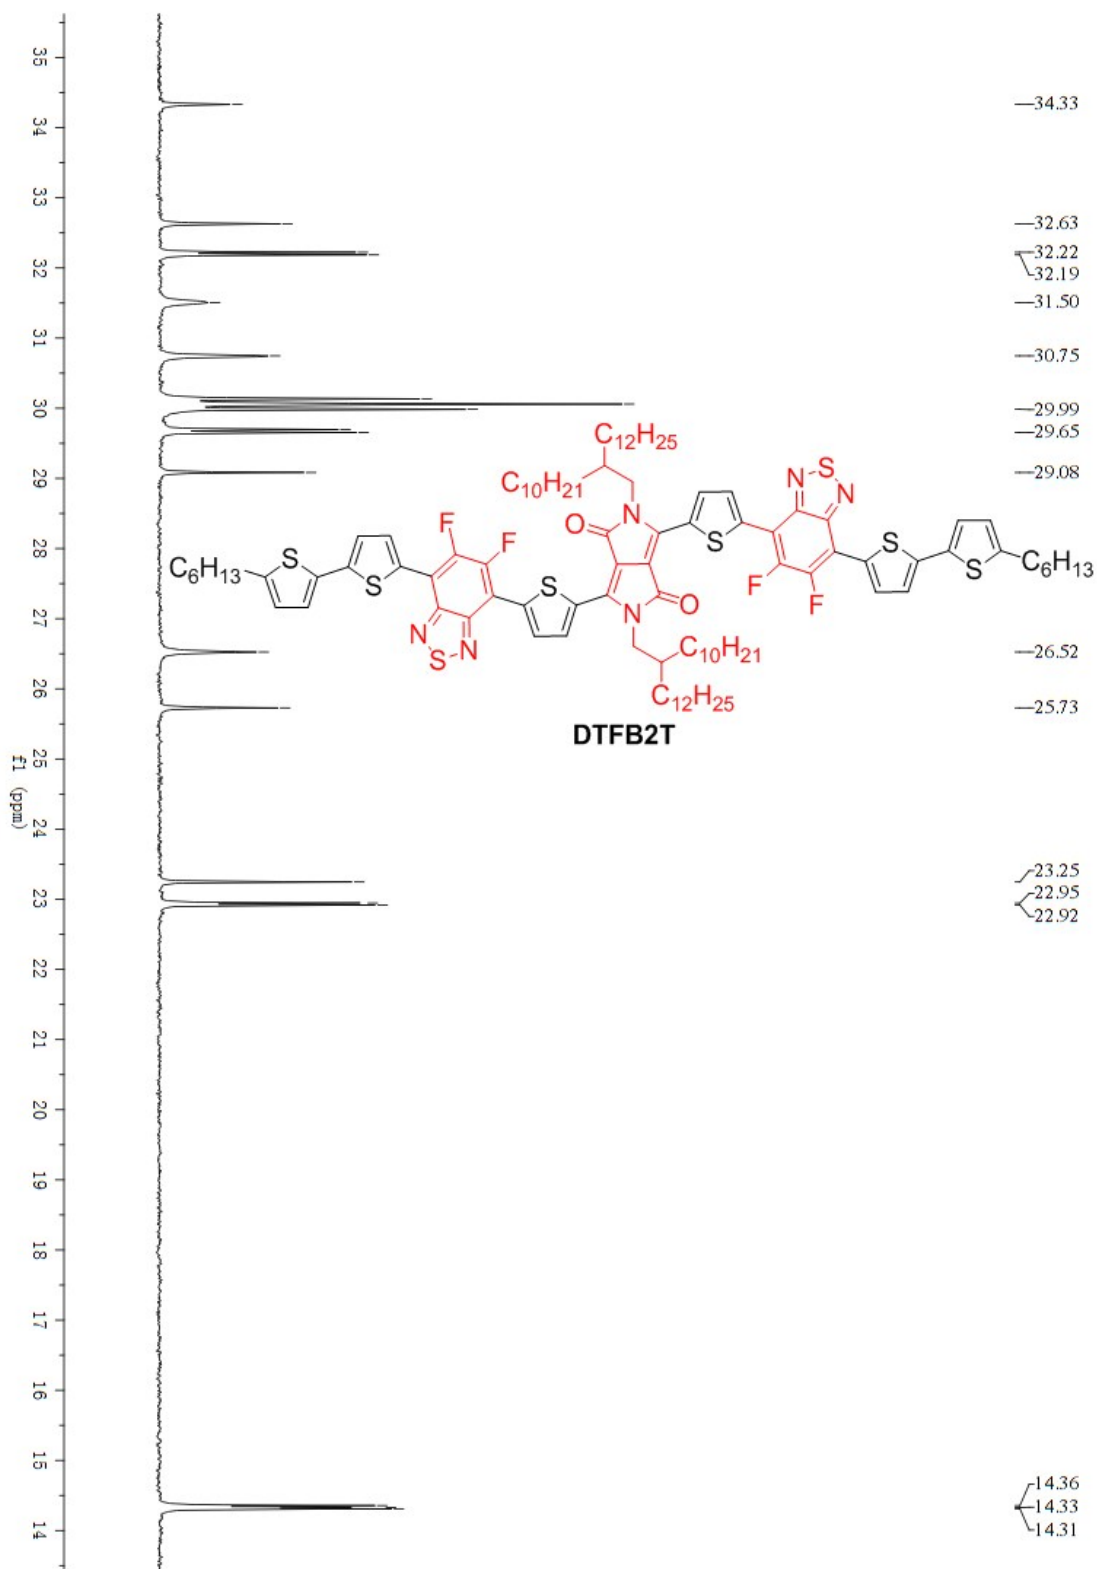

The expanded  $^{13}\text{C}$  NMR spectrum of **DTFB2T** in  $\text{CDCl}_3$ .



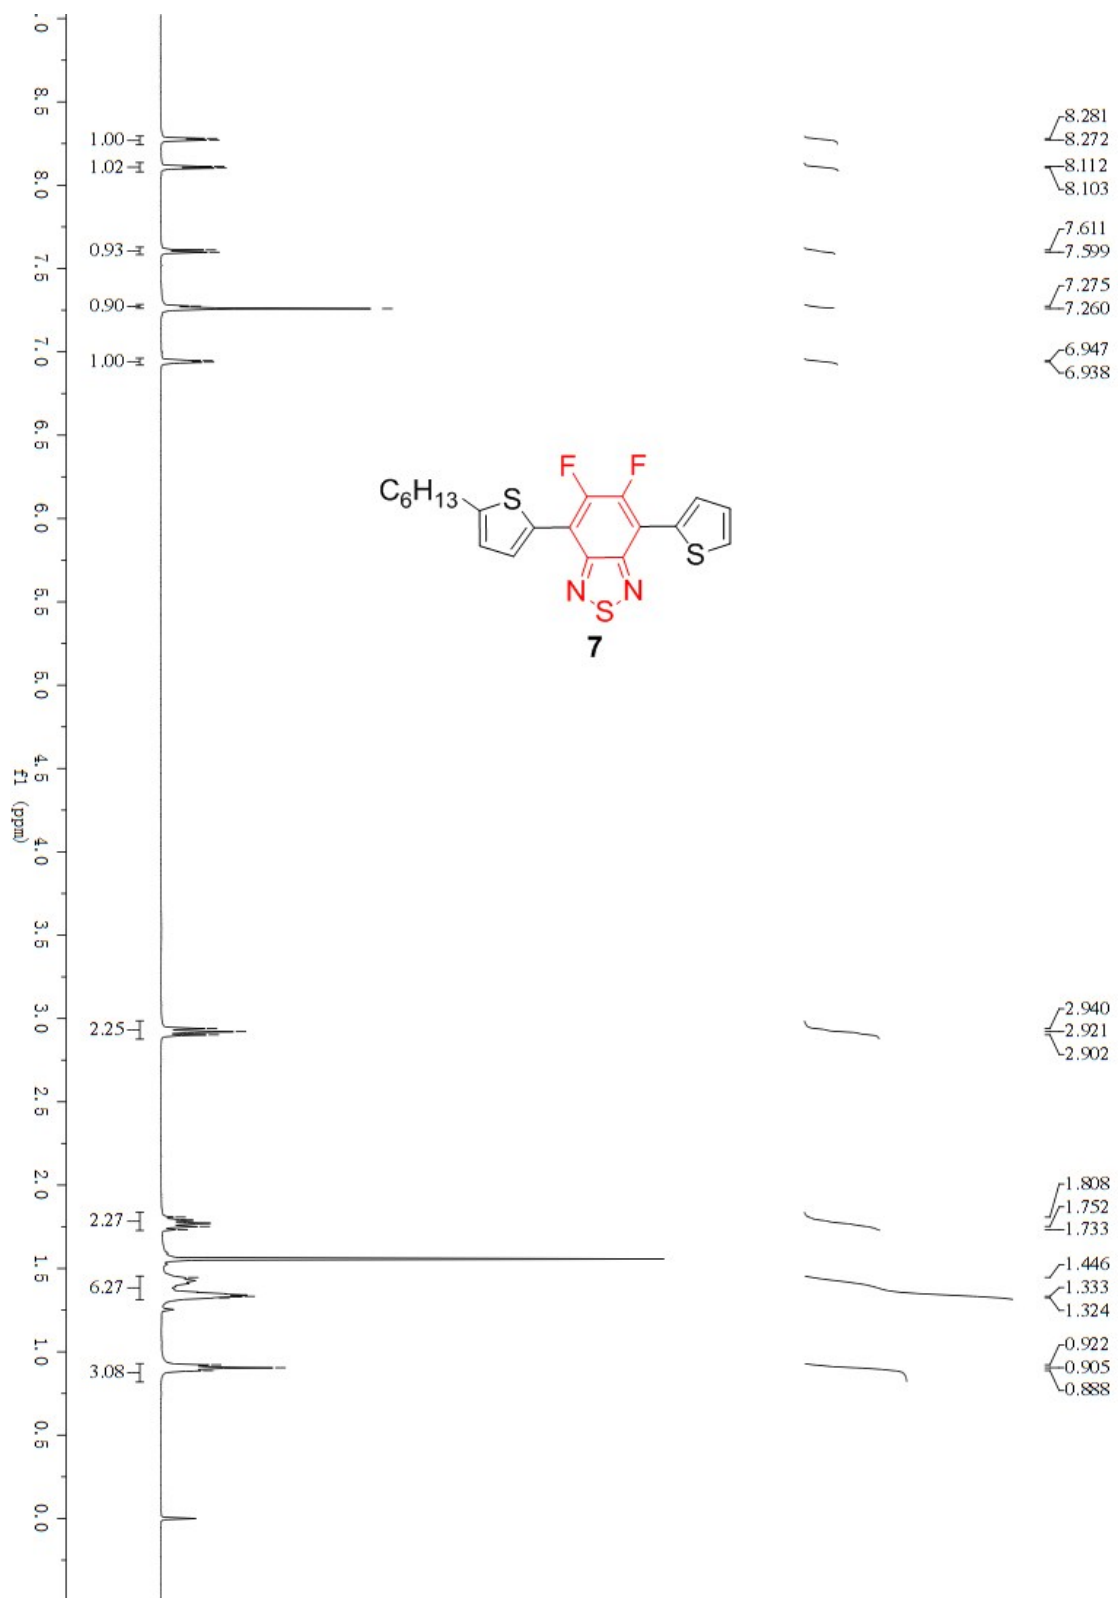

<sup>1</sup>H NMR spectrum of **7** in CDCl<sub>3</sub>.

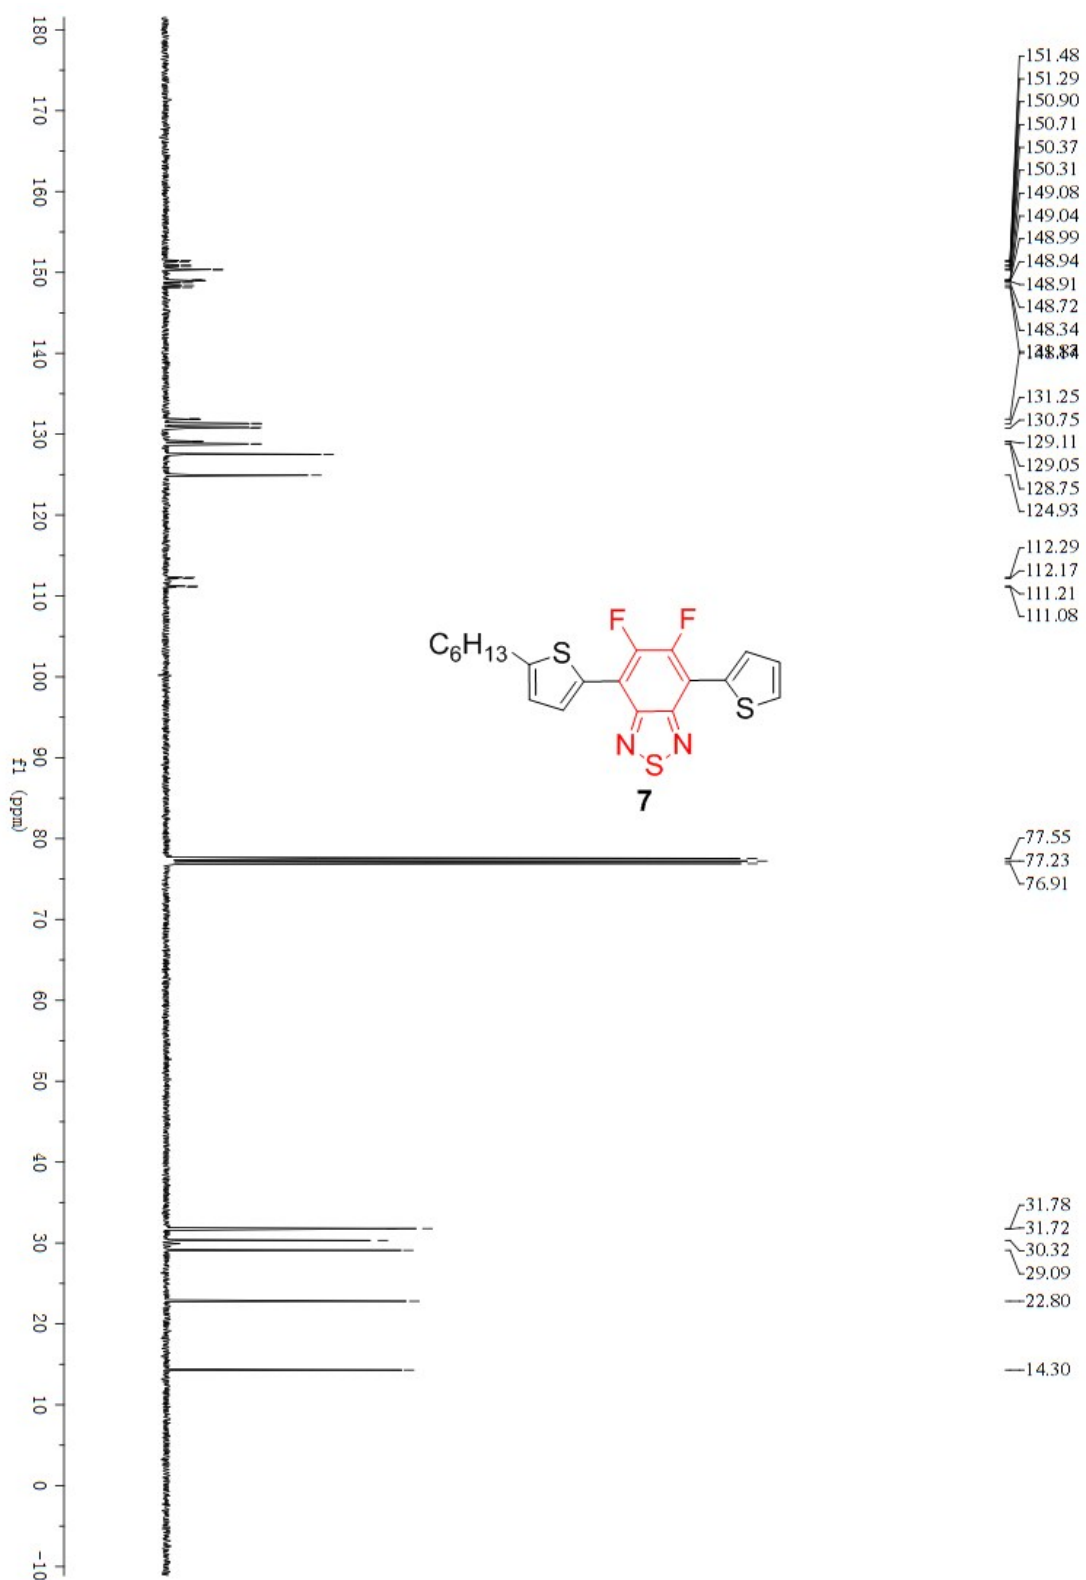

<sup>13</sup>C NMR spectrum of **7** in CDCl<sub>3</sub>.

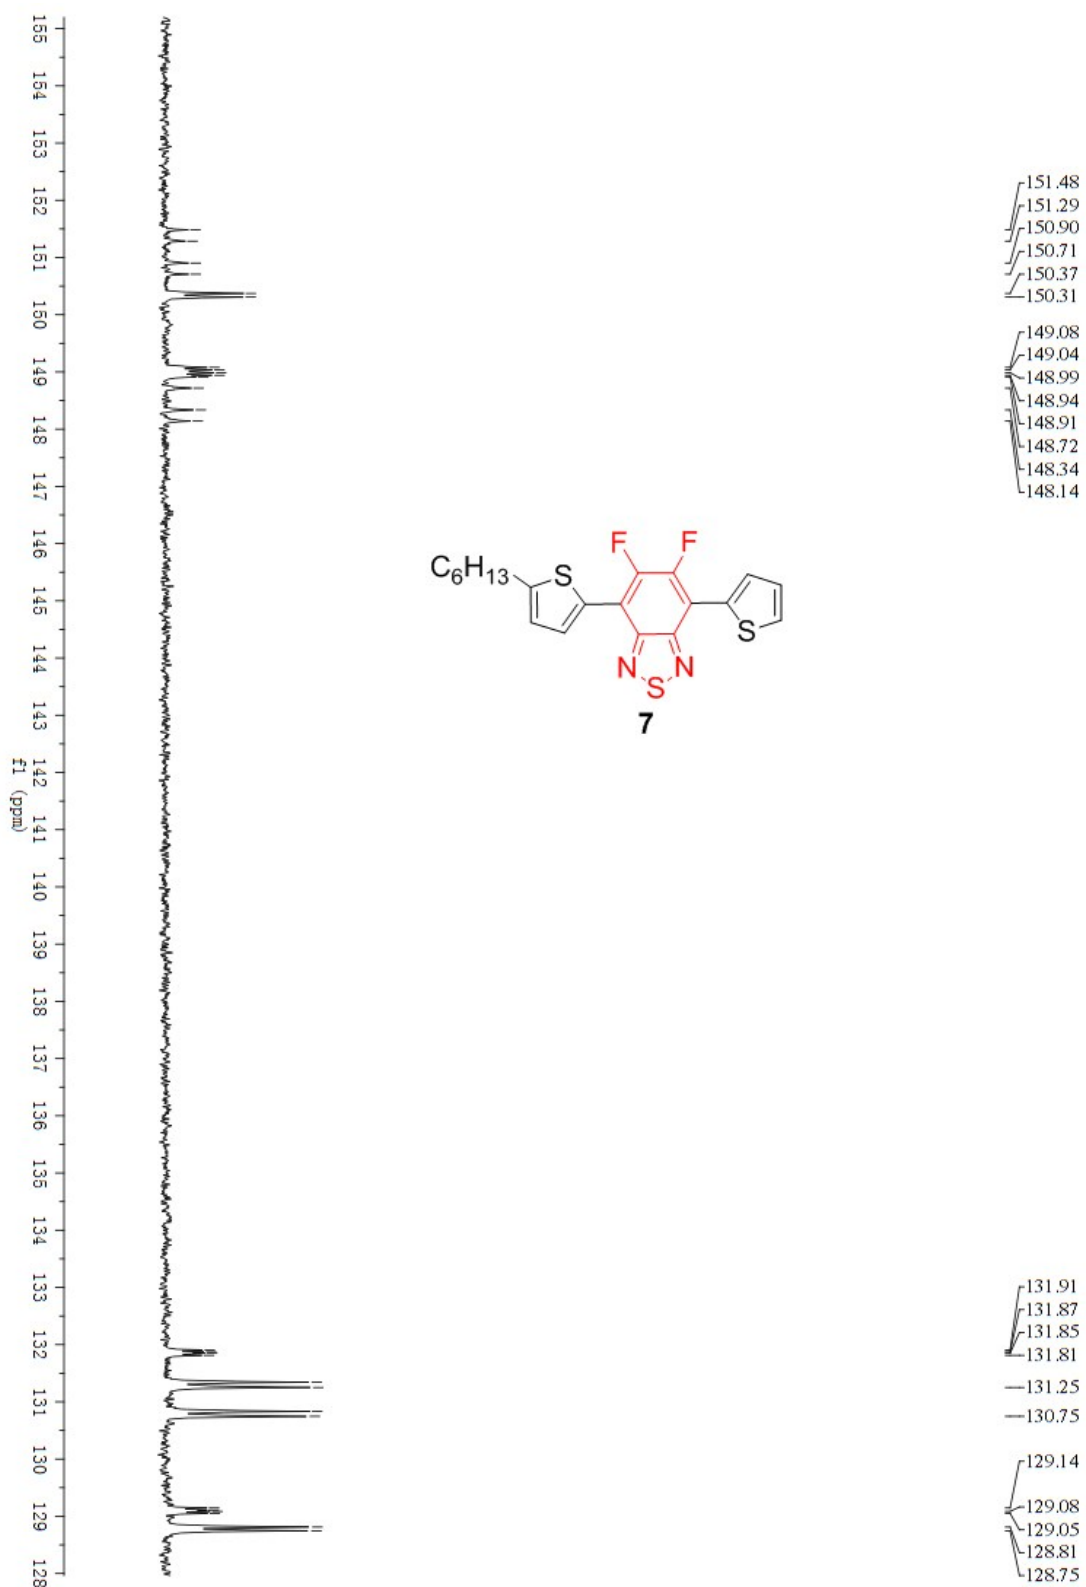

The expanded  $^{13}\text{C}$  NMR spectrum of **7** in  $\text{CDCl}_3$ .

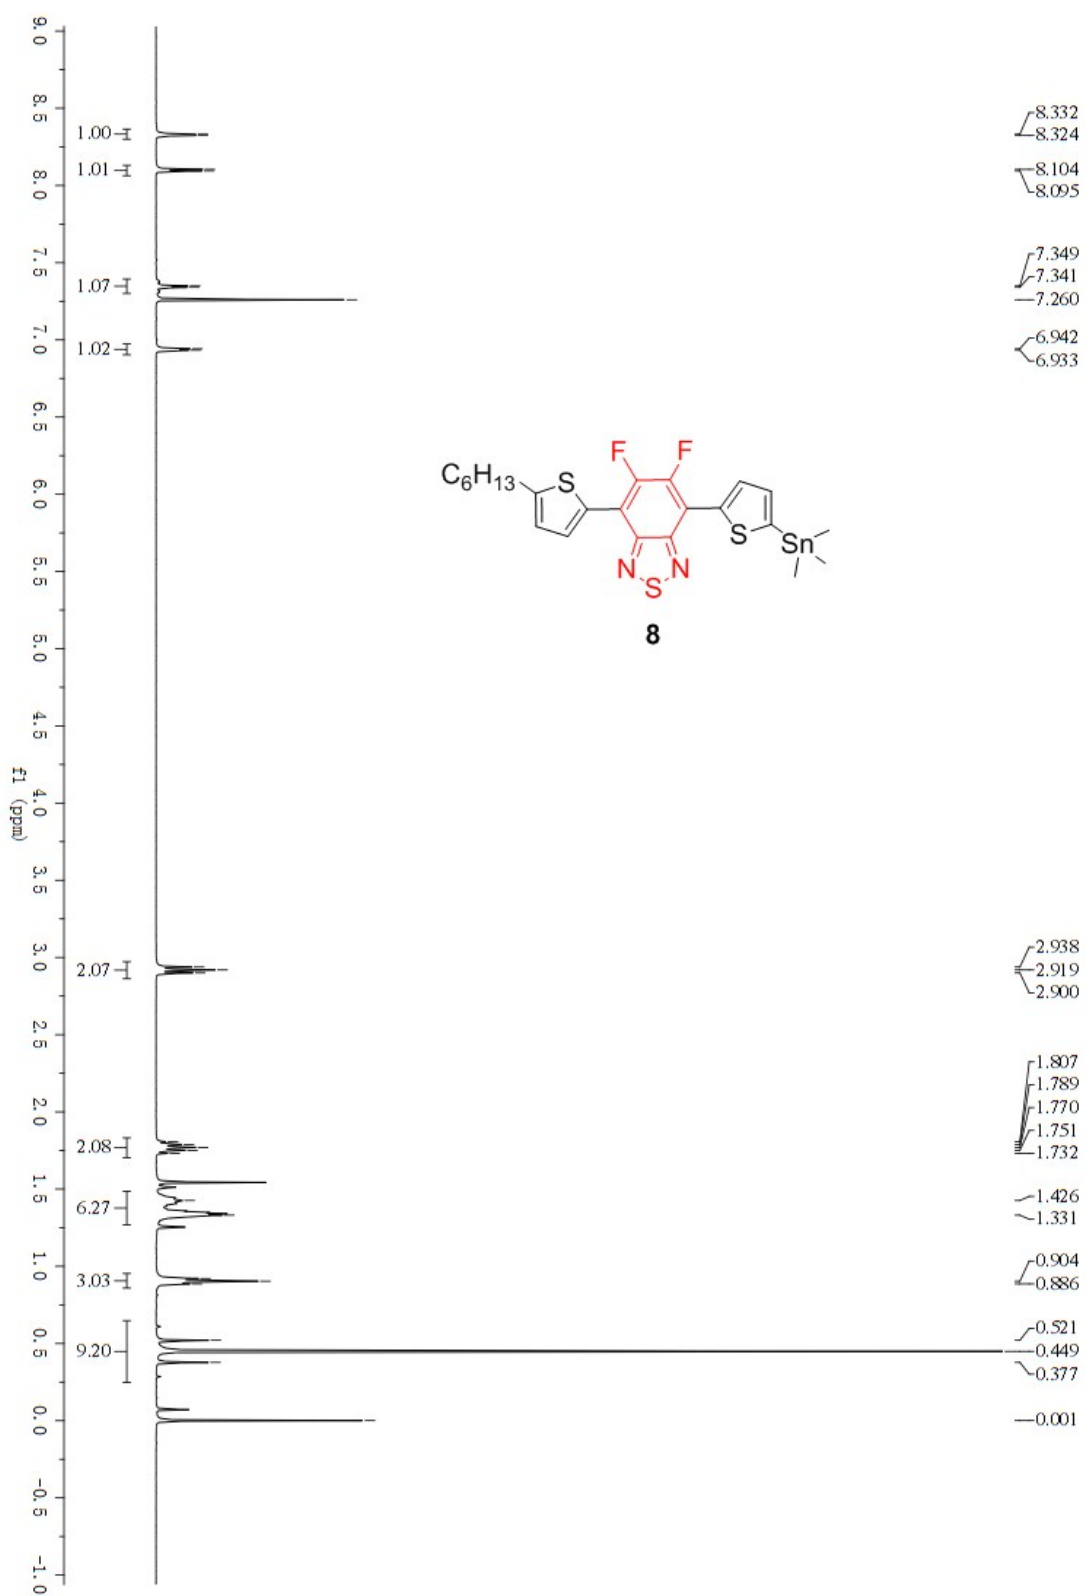

<sup>1</sup>H NMR spectrum of **8** in CDCl<sub>3</sub>.

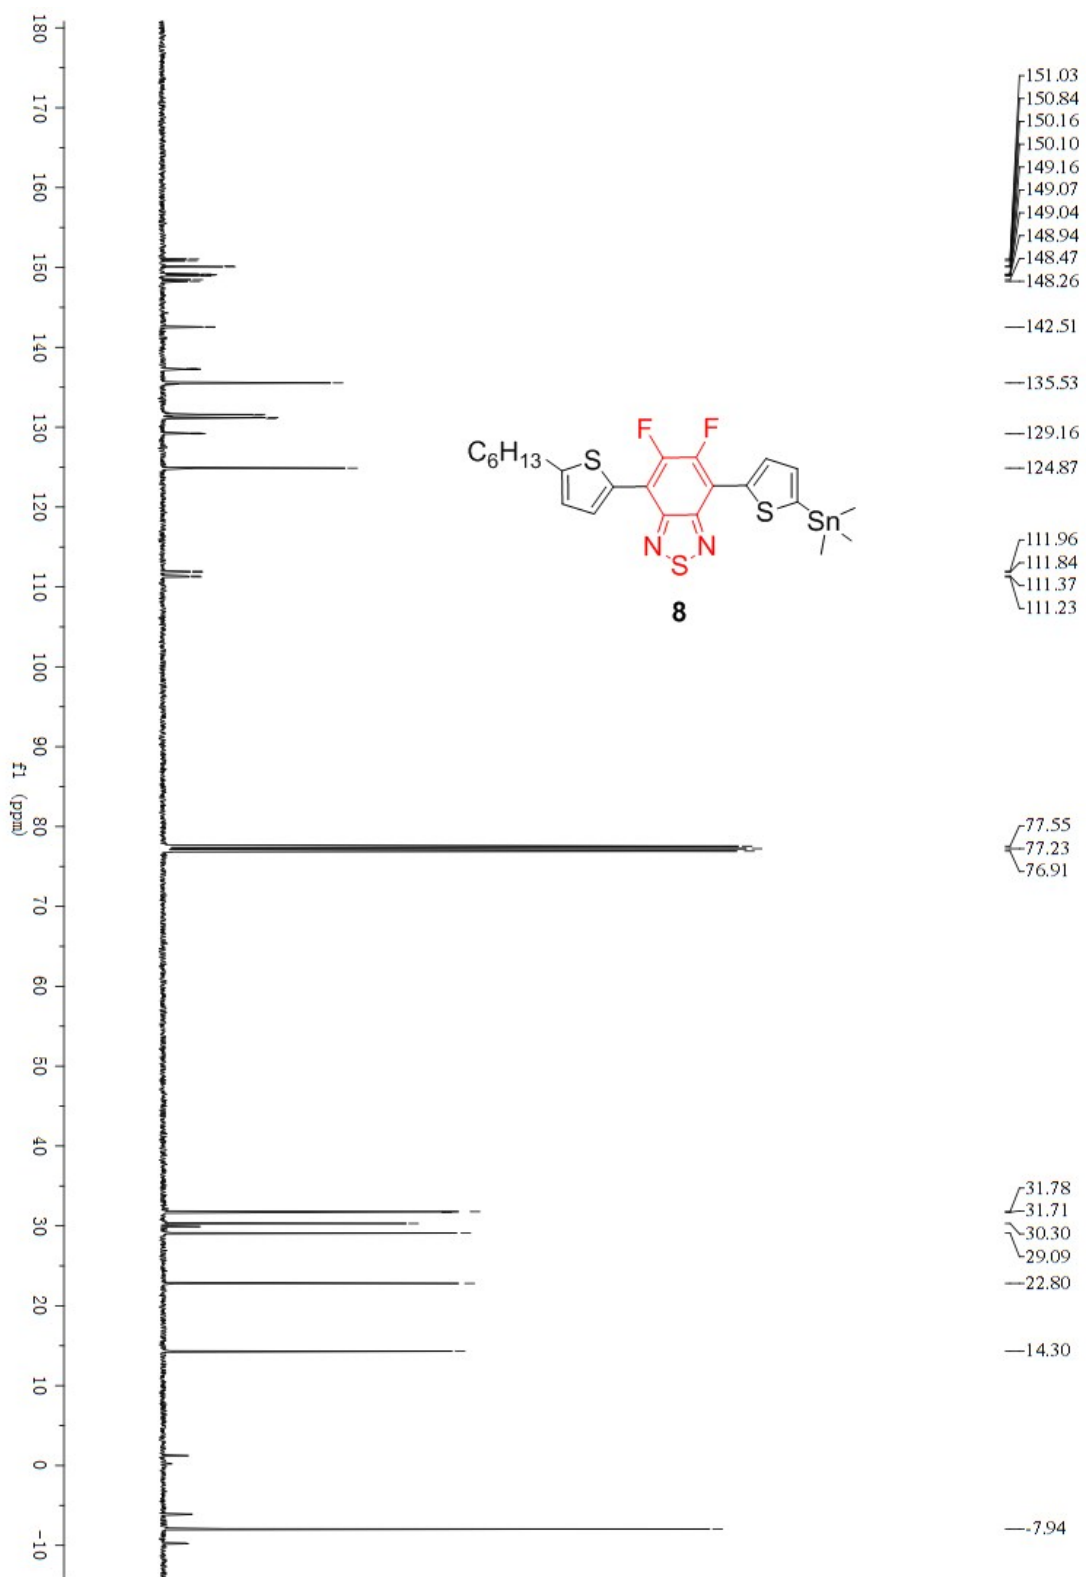

$^{13}\text{C}$  NMR spectrum of **8** in  $\text{CDCl}_3$ .

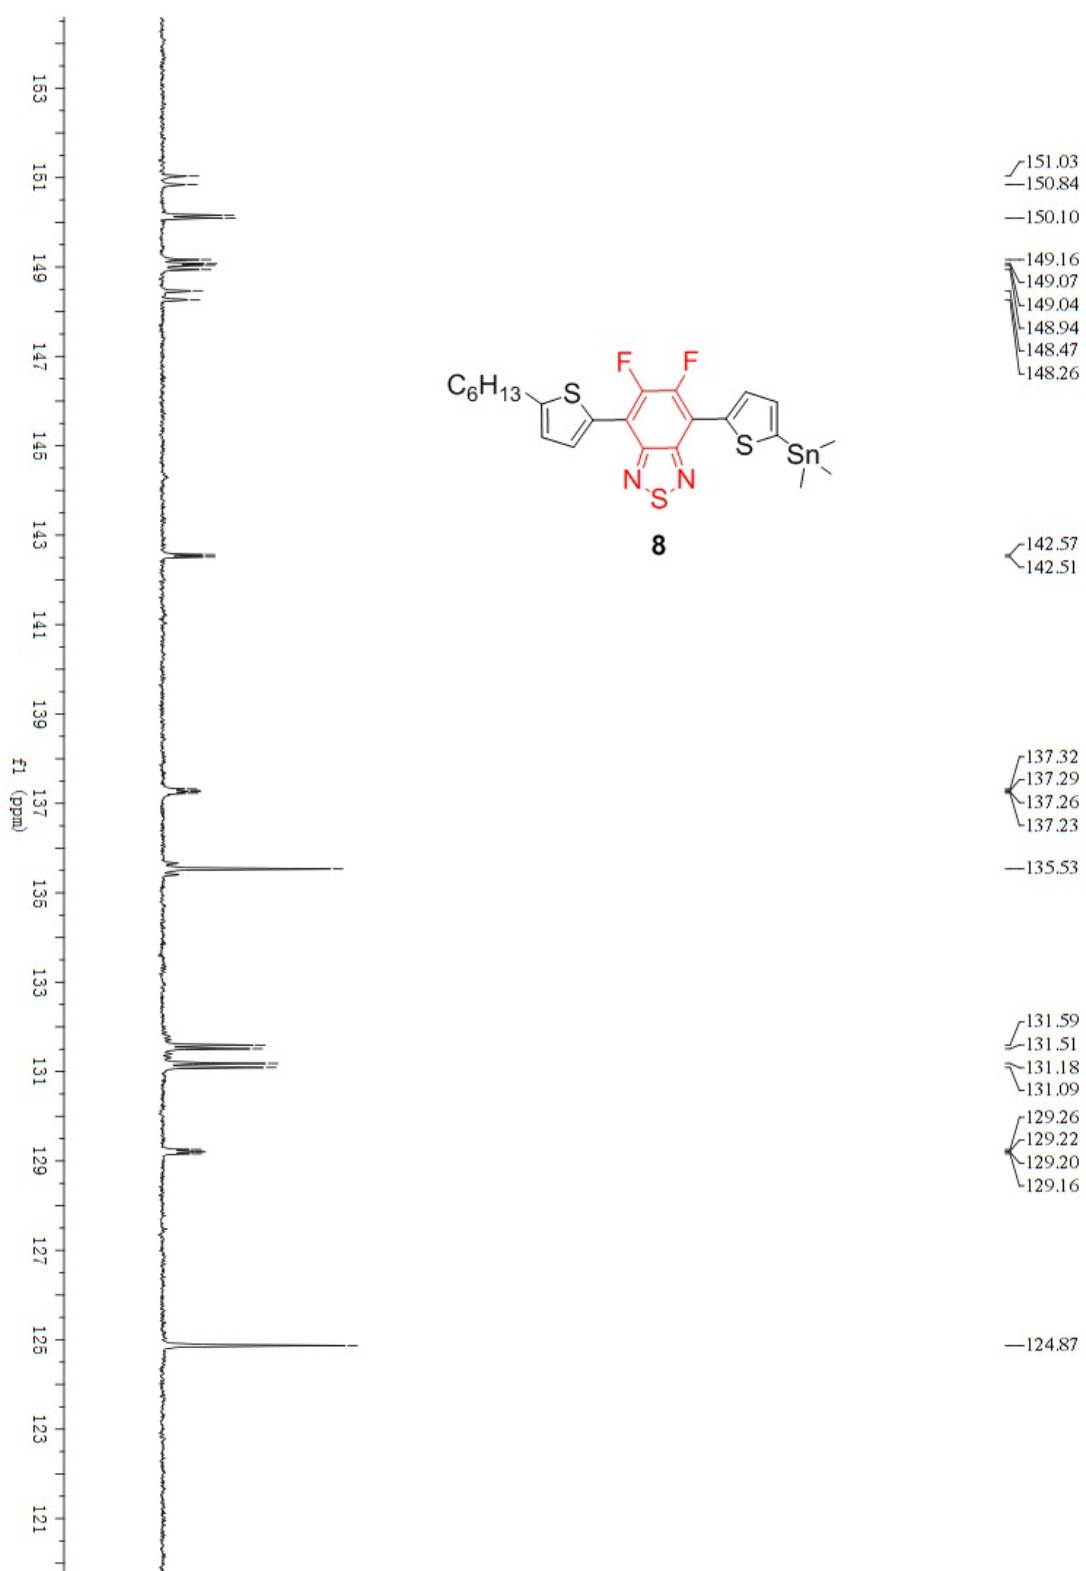

The expanded <sup>13</sup>C NMR spectrum of **8** in CDCl<sub>3</sub>.

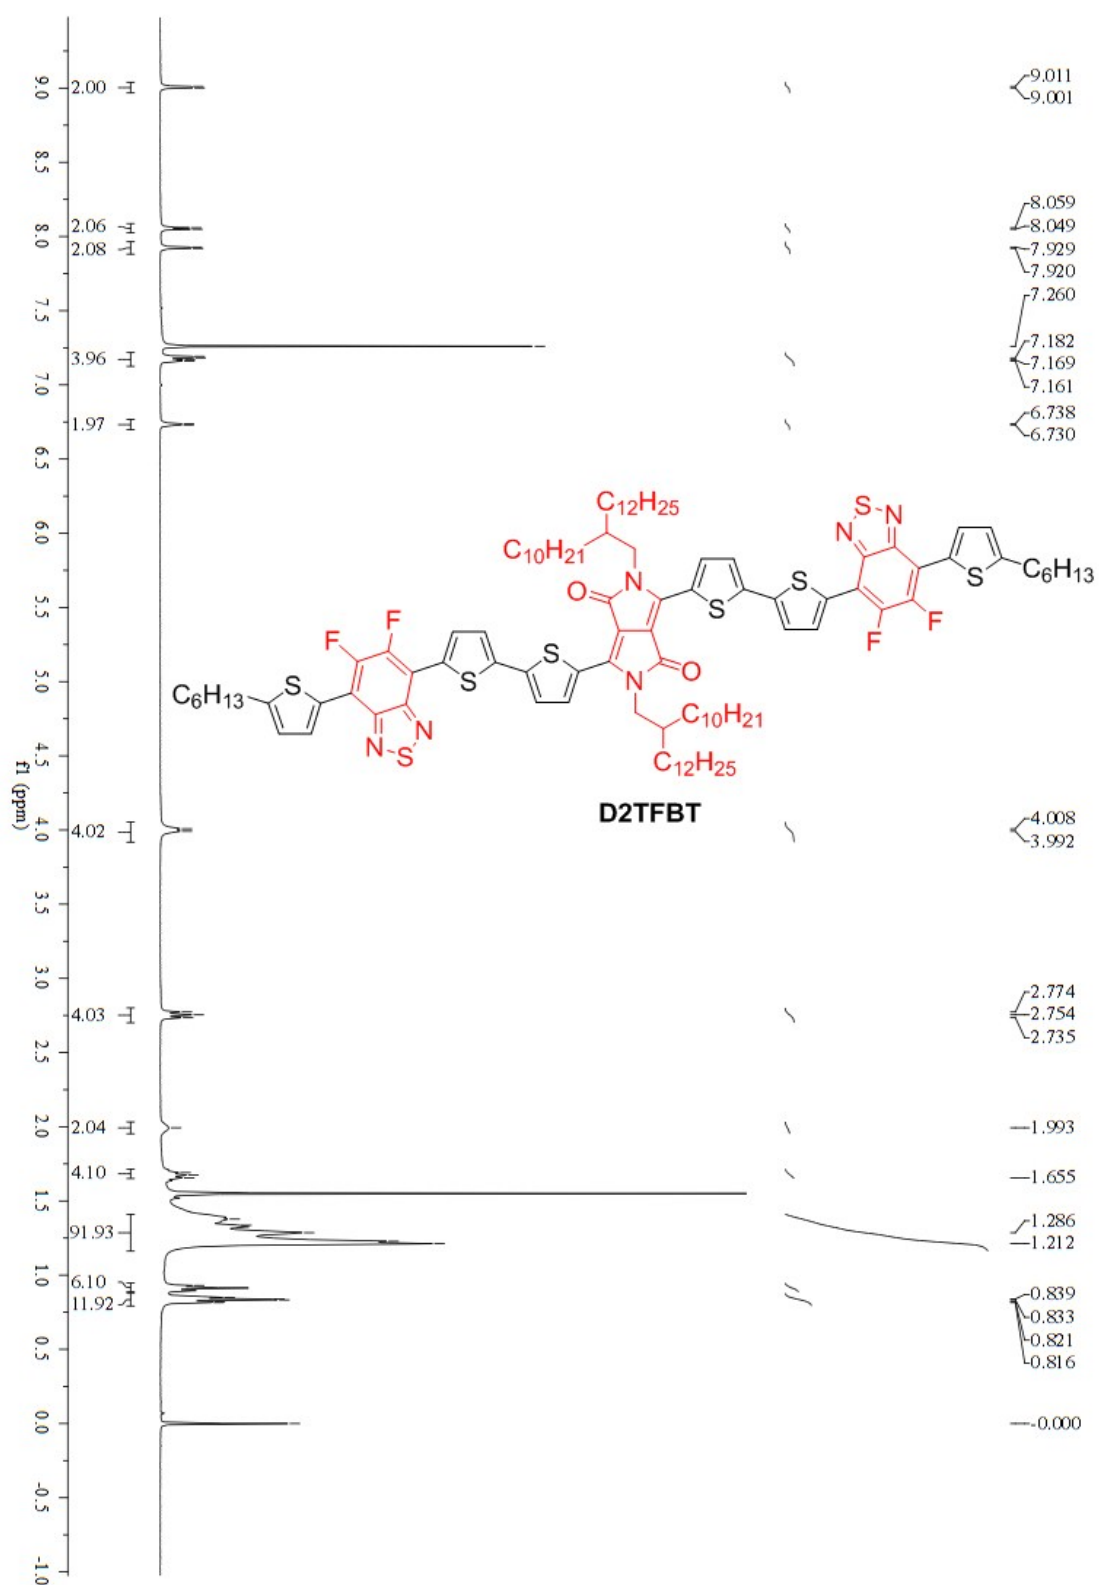

$^1\text{H}$  NMR spectrum of **D2TFBT** in  $\text{CDCl}_3$ .
